1 **Site of vulnerability on SARS-CoV-2 spike induces broadly protective**  
2 **antibody to antigenically distinct omicron SARS-CoV-2 subvariants**

3  
4 Siriruk Changrob<sup>1,10</sup>, Peter J. Halfmann<sup>2,10</sup>, Hejun Liu<sup>3,10</sup>, Jonathan L. Torres<sup>3,10</sup>, Joshua  
5 J.C. McGrath<sup>1</sup>, Gabriel Ozorowski<sup>3</sup>, Lei Li<sup>1</sup>, Makoto Kuroda<sup>2</sup>, Tadashi Maemura<sup>2</sup>, Min  
6 Huang<sup>1</sup>, G. Dewey Wilbanks<sup>1</sup>, Nai-Ying Zheng<sup>1</sup>, Hannah L. Turner<sup>3</sup>, Steven A.  
7 Erickson<sup>4</sup>, Yanbin Fu<sup>1</sup>, Gagandeep Singh<sup>6,7</sup>, Florian Krammer<sup>6,7</sup>, D. Noah Sather<sup>8</sup>,  
8 Andrew B. Ward<sup>3</sup>, Ian A. Wilson<sup>3,9</sup>, Yoshihiro Kawaoka<sup>2,5</sup>, Patrick C. Wilson<sup>1, 11\*</sup>

9  
10 **Affiliations:**

11 <sup>1</sup> Druker Institute for Children's Health, Weill Cornell Medicine, New York, New York,  
12 USA.

13 <sup>2</sup> Influenza Research Institute, Department of Pathobiological Sciences, School of  
14 Veterinary Medicine, University of Wisconsin-Madison, Madison, WI 53711.

15 <sup>3</sup> Department of Integrative Structural and Computational Biology, The Scripps Research  
16 Institute, La Jolla, CA 92037, USA.

17 <sup>4</sup> University of Chicago Department of Medicine, Section of Rheumatology, Chicago, IL  
18 60637, USA.

19 <sup>5</sup> Division of Virology, Department of Microbiology and Immunology, Institute of Medical  
20 Science, University of Tokyo, 108-8639 Tokyo, Japan.

21 <sup>6</sup> Department of Pathology, Molecular and Cell Based Medicine, Icahn School of Medicine  
22 at Mount Sinai, New York, NY, USA.

23 <sup>7</sup> Center for Vaccine Research and Pandemic Preparedness, Icahn School of Medicine  
24 at Mount Sinai, New York, NY, USA.

25 <sup>8</sup> Center for Global Infectious Disease Research, Seattle Children's Research Institute,  
26 Seattle, Washington, USA; Department of Pediatrics, University of Washington, Seattle,  
27 Washington, USA; Department of Global Health, University of Washington, Seattle,  
28 Washington, USA.

29 <sup>9</sup> The Skaggs Institute for Chemical Biology; The Scripps Research Institute; La Jolla, CA  
30 92037; USA.

31 <sup>10</sup> These authors contributed equally

32 <sup>11</sup> Lead Contact.

33 \*Correspondence: [pcw4001@med.cornell.edu](mailto:pcw4001@med.cornell.edu) (P.C.W.)

34 **Summary**

35 The rapid evolution of SARS-CoV-2 Omicron variants has emphasized the need to  
36 identify antibodies with broad neutralizing capabilities to inform future monoclonal  
37 therapies and vaccination strategies. Herein, we identify S728-1157, a broadly  
38 neutralizing antibody (bnAb) targeting the receptor-binding site (RBS) and derived from  
39 an individual previously infected with SARS-CoV-2 prior to the spread of variants of  
40 concern (VOCs). S728-1157 demonstrates broad cross-neutralization of all dominant  
41 variants including D614G, Beta, Delta, Kappa, Mu, and Omicron  
42 (BA.1/BA.2/BA.2.75/BA.4/BA.5/BL.1). Furthermore, it protected hamsters against *in vivo*  
43 challenges with wildtype, Delta, and BA.1 viruses. Structural analysis reveals that this  
44 antibody targets a class 1 epitope via multiple hydrophobic and polar interactions with its  
45 CDR-H3, in addition to common class 1 motifs in CDR-H1/CDR-H2. Importantly, this  
46 epitope is more readily accessible in the open and prefusion state, or in the hexaprotline  
47 (6P)-stabilized spike constructs, as compared to diprotline (2P) constructs. Overall, S728-  
48 1157 demonstrates broad therapeutic potential, and may inform target-driven vaccine  
49 design against future SARS-CoV-2 variants.

50

51

## 52 **Introduction**

53 Since the start of the pandemic in December 2019, the severe acute respiratory syndrome  
54 coronavirus 2 (SARS-CoV-2) virus has led to over 576 million cases of coronavirus  
55 disease 2019 (COVID-19) and over six million deaths globally. Although the rapid  
56 development and distribution of vaccines and therapeutics has curbed the impact of  
57 COVID-19 to an extent, the emergence of circulating variants of concern (VOCs)  
58 continues to represent a major threat due to the potential for further immune evasion and  
59 enhanced pathogenicity. The D614G variant was the earliest variant to emerge and  
60 became universally prevalent thereafter. In comparison to wildtype (WT), the D614G  
61 variant exhibited increased transmissibility rather than increased pathogenicity and was  
62 therefore unlikely to reduce efficacy of vaccines in clinical trials<sup>1</sup>. Between the emergence  
63 D614G and October 2021, four additional significant VOC evolved worldwide, including  
64 Alpha, Beta, Gamma, and Delta. Among these variants, Delta became a serious global  
65 threat as a result of its transmissibility, increased disease severity, and partial immune  
66 evasion as shown by the reduced ability of polyclonal serum and monoclonal antibodies  
67 (mAbs) to neutralize this strain<sup>2-6</sup>. Shortly afterwards, in November 2021, the Omicron  
68 variant was identified and announced as a novel VOC. This variant possessed the largest  
69 number of mutations to date and appeared to spread more rapidly than previous strains<sup>7,8</sup>.  
70 Currently, there are five major subvariant lineages of Omicron (BA.1, BA.2, BA.3, BA.4  
71 and BA.5) leading to new COVID-19 cases, with BA.5 becoming dominant over BA.2 and  
72 accounting for most new cases in the United States at the time of writing. The Omicron  
73 variants can escape recognition by COVID-19 vaccine-associated immunity to varying  
74 extents, thereby significantly reducing the neutralizing potency of serum antibodies from  
75 convalescent and fully mRNA-vaccinated individuals<sup>9</sup>. Similarly, Omicron variants were  
76 able to escape binding of several Emergency Use-Authorization (EUA) therapeutic mAbs  
77 even though these had been previously shown to be effective against earlier VOCs<sup>10,11</sup>.  
78 Due to the lowered neutralization against Omicron and the continued threat of future  
79 VOCs, there is an urgent need to identify broad and potent neutralizing antibodies that  
80 can protect against diverse evolving SARS-CoV-2 lineages.

81 In this study, we identify a potent RBD-reactive monoclonal antibody from the  
82 peripheral blood of SARS-CoV-2 convalescent individual that effectively neutralize Alpha,  
83 Beta, Kappa, Delta, Mu, and Omicron variants (BA.1, BA.2, BA.2.75, BA.4, BA.5 and  
84 BL.1). This mAb, S728-1157, can reduce BA.1 Omicron viral titer *in vivo* and significantly  
85 reduced viral loads during wildtype and Delta infection. In terms of specificity, S728-1157  
86 bound the receptor binding site (RBS) that is fully exposed when the RBD on the spike is  
87 in the up conformation. S728-1157 binds using motifs found in the CDR-H1 and CDR-H2  
88 domains that are common to IGHV3-53/3-66 class 1 antibodies but also via extensive  
89 unique contacts with CDR-H3 to circumvent mutations in the variant virus spikes. This  
90 suggests that the rational design of future vaccine boosts covering Omicron variants  
91 should be modified to present stabilized spike in the up configuration to optimally induce  
92 class 1 mAbs that have similar CDR-H3 features.

93

## 94 **Results**

### 95 **Isolation of RBD-reactive mAbs that exhibit diverse patterns of neutralization and** 96 **potency**

97 Before the spread of the Omicron variant, we previously characterized 43 mAbs targeting  
98 distinct epitopes on the spike protein, including the N-terminal domain (NTD), RBD, and  
99 subunit 2 (S2), although none were able to neutralize all existing SARS-CoV-2 variants  
100 at that time<sup>12</sup>. In the current study, an additional panel of RBD-reactive mAbs were  
101 expressed from three high-responder subjects who mounted robust anti-spike IgG  
102 responses, as defined previously ([Table S1 and Table S2](#))<sup>13</sup>. Although the proportion of  
103 spike RBD-binding B cells was similar in high-responders as compared to mid- and low-  
104 responders ([Figure 1a-c](#)), heavy chain somatic hypermutation rates were significantly  
105 greater in the high-responder group ([Figure 1d](#)), suggesting that these subjects may have  
106 the highest potential to generate potent cross-reactive mAbs<sup>13</sup>. These antibodies were  
107 assayed for binding to key RBD mutants to identify their epitope classifications ([Table](#)  
108 [S3](#))<sup>14</sup>. Among 14 RBD-reactive mAbs, we identified four class 2 mAbs, two class 3 mAbs,  
109 and eight unclassified mAbs that showed little to no reduction of binding against any key  
110 RBD mutants tested ([Figure 1f](#)). Class 2 and 3 RBD mAbs did not recognize a multivalent

111 RBD mutant containing K417N/E484K/L452R/N501Y substitutions, an artificially  
112 designed RBD to include key mutations for virus escape<sup>14,15</sup>, nor cross-reactivity to the  
113 RBD of SARS-CoV-1 and Middle Eastern respiratory syndrome (MERS)-CoV (Figure 1f).  
114 Functionally, class 2 and 3 RBD mAbs potently neutralized D614G and Delta but  
115 neutralizing activity was limited against Beta, Kappa and Mu (Figure 1g). No class 2 or 3  
116 antibodies assayed could neutralize any tested Omicron variant.

117 In contrast, the majority of unclassified mAbs bound to the RBD multivariant and  
118 cross-reacted to the SARS-CoV-1 RBD (Figure 1f). Among these, we went on to identify  
119 three bnAbs, S451-1140, S626-161 and S728-1157, that showed high neutralization  
120 potency against D614G and could cross-neutralize Beta, Delta, Kappa, Mu and BA.1 with  
121 99% inhibitory concentration (IC<sub>99</sub>) in the range of 20-2500 ng/ml (Figure 1g). Given the  
122 broad neutralization potency of these three mAbs, in addition of plaque assay platform,  
123 we also performed the neutralization activity against authentic BA.2.75, BL.1  
124 (BA.2.75+R346T), BA.4, and BA.5 viruses using focus reduction neutralization test  
125 (FRNT) (Figure 1g). Of these, S728-1157 displayed high neutralizing activities against  
126 the panel of Omicron variants including BA.1, BA.2, BA.4 and BA.5, with IC<sub>99</sub> up to 100  
127 ng/ml as measured by plaque assay. A similar scenario was observed using FRNT, S728-  
128 1157 maintains its high neutralization activity against BA.2.75, BL.1, BA.4 and BA.5 with  
129 50% inhibitory concentration (IC<sub>50</sub>) in the range of 8-16 ng/ml (Figure 1g). S451-1140  
130 neutralized BA.1, BA.2, BA.2.75 and BL.1 potently, but not BA.4 and BA.5 as observed  
131 in both neutralization assay platforms. On the other hand, S626-161 did not demonstrate  
132 neutralizing activity against Omicron variants beyond the BA.1 variant (Figure 1g).  
133 Although S626-161 had a lower neutralization potency against VOC than the other two,  
134 it was the only mAb which showed cross-reactivity to SARS-CoV-1 RBD and was able to  
135 neutralize bat coronaviruses WIV-1 and RsSHC014 (Figure 1f-g). These data suggest  
136 that S626-161 recognizes a conserved epitope that is shared between these sarbecovirus  
137 lineages, but is absent in BA.2. Additionally, compared to S728-1157 and S451-1140,  
138 S626-161 has a longer CDR-H3 which could provide an enhanced capability to recognize  
139 a highly conserved patch of residues shared across sarbecoviruses as described in a  
140 previous study<sup>16</sup> (Figure S1). When comparing immunoglobulin heavy (IGHV) and light

141 chain (IGLV or IGKV) variable genes of these three bnAbs with the available SARS-CoV-  
142 2 neutralizing mAbs database<sup>12,17-25</sup>, we found that heavy chain variable genes utilized  
143 by S728-1157 (IGHV3-66), S451-1140 (IGHV3-23) and S626-161 (IGHV4-39) have been  
144 previously reported to encode several potentially neutralizing SARS-CoV-2 antibodies  
145 targeting the RBD<sup>18,19,26,27</sup>. However, only S728-1157 had unique heavy and light chain  
146 variable gene pairings that have not been reported in the database (Table S2), indicating  
147 that it is not public clonotype.

148 These three bnAbs (S451-1140, S626-161 and S728-1157) were characterized  
149 further to determine the binding breadth against SARS-CoV-2 VOCs (Figure 1h-k). The  
150 prefusion-stabilized spike containing two-proline substitutions in the S2 subunit (2P;  
151 diproline) has been shown to be a superior immunogen compared to the wildtype spike  
152 and is the basis of several current SARS-CoV-2 vaccines, including current mRNA-based  
153 vaccines<sup>28,29</sup>. More recently, spike protein stabilized with six prolines (6P; hexaproline)  
154 was shown to boost expression and be even more stable than the original diproline  
155 construct; as a result, it has been proposed for use in improving the next-generation of  
156 COVID-19 vaccines<sup>30,31</sup>. To determine if there are antigenicity differences between the  
157 diproline and hexaproline spike constructs, both immunogens were included in our test  
158 panel. As measured by ELISA assay, we found that three bnAbs bound 6P-WT spike  
159 antigen to a greater extent compared to WT-2P spike (Figure 1h-j). All three bnAbs  
160 showed comparable binding to the spikes of Alpha, Beta, Gamma and Delta viruses,  
161 relative to that of WT-2P (Figure 1h-j). However, the binding reactivity of these three  
162 bnAbs were substantially reduced against a panel of Omicron-family antigens (Figure 1h-  
163 k). S451-1140 binding was sensitive to mutations found in BA.1 and BA.2, resulting in  
164 largely decrease in binding and a 31-fold decrease in neutralization against these variants  
165 compared with WT-2P antigen and D614G virus, respectively (Figure 1g, i, k). The  
166 sarbecovirus-cross neutralizing mAb, S626-161 also showed 1.7 to 3.9-fold reduced  
167 binding to spike BA.1 antigens which may be affected in a 2-fold reduction in  
168 neutralization activity against BA.1 (Figure 1g, j, k). For the most potent bnAb, S728-1157,  
169 binding to Omicron antigens was substantially reduced by greater than 1.7-fold (range of  
170 1.7- to 5.5-fold) compared with WT-2P spike but was unaffected in neutralizing activity

171 (Figure 1g, h, k). Notably, all three bnAbs showed over 3-fold increased binding to spike  
172 BA.1-6P compared with the BA.1-2P version, suggesting a better accessibility of bnAbs  
173 to the hexaproline spike BA.1 construct. In addition to ELISA, biolayer interferometry (BLI)  
174 was used to quantify the binding rate and equilibrium constants ( $k_{on}$ ,  $k_{off}$ , and  $K_D$ ) of these  
175 three bnAbs to a panel of spike antigens (Figure S2b-d). The recognition  $k_{on}$  rates of Fabs  
176 were 1.5 to 3.3-fold faster to hexaproline spikes, showing that the antibodies bound to the  
177 6P construct more rapidly than to 2P. This is expected if the epitopes are more exposed  
178 on the RBD in the open state on the hexaproline spike (Figure S2c). Except for S626-  
179 161, off-rate of the Fabs were also longer such that the overall  $K_D$  showed that S728-1157  
180 and S451-1140 bound to the hexaproline spike with substantially greater affinity (Figure  
181 S2c-d). The increased off rates further suggest partial occlusion of the binding site on  
182 diproline spike. The improved binding to hexaproline spike was even more notable for  
183 whole dimeric IgG by the 1:2 interaction model and for all three bnAbs, consistent with  
184 exposure of multiple epitopes with 6P stabilization allowing improved avidity (Figure S2b-  
185 d). Taken together, these results suggest that the epitopes targeted may be comparatively  
186 more accessible on the 6P-stabilized spike with the RBD in the open state. Structural  
187 analyses were next performed to verify this conjecture.

188

### 189 **Structural analysis of broadly neutralizing monoclonal antibodies**

190 As a first approximation of epitopes bound, an ELISA competition assay was used to  
191 determine whether the three broadly-neutralizing mAbs shared any overlap with our  
192 current panel of mAbs and a collection of mAbs with known epitope specificities from  
193 previous studies<sup>12,32,33</sup>, plus two other mAbs currently in clinical use (LY-CoV555 (Eli  
194 Lilly)<sup>34</sup> and REGN10933 (Regeneron)<sup>35</sup>). The binding sites of S451-1140 and S728-1157  
195 partially overlapped with CC12.3<sup>33,36</sup>, a class 1 neutralizing antibody, and most class 2  
196 antibodies, including LY-CoV555 and REGN10933, but not with class 3 and class 4  
197 antibodies (Figure 2a). S626-161 shared a notable overlap in binding region with class 1  
198 CC12.3, several class 4 antibodies including CR3022, and other unclassified antibodies,  
199 while having some partial overlap with several class 2 and one class 3 antibodies (Figure  
200 2a). Analogously, competition BLI assay revealed that S451-1140 and S728-1157



201 strongly competed with one another for binding to spike WT-6P, whereas S626-161 did  
202 not (Figure S3). Overall, these data suggest S451-1140 and S728-1157 recognize similar  
203 epitopes that are distinct from S626-161.

204 S728-1157 was encoded by IGHV3-66 and possessed a short complementarity  
205 determining region 3 (CDR-H3). Notably, mAbs that bind the receptor binding site (RBS)  
206 in binding mode 1 (i.e. RBS-A or class 1 site), typified by CC12.1, CC12.3, B38, and  
207 C105<sup>15,25,27,36-38</sup>, tend to use IGHV3-53/3-66 and are sensitive to VOC mutations<sup>39</sup>.  
208 However, the CDR-H3 region of S728-1157 is highly distinct from other antibodies of this  
209 class, potentially accounting for its broader activity. To understand the structural basis of  
210 broad neutralization by S728-1157 at this epitope, we resolved a cryo-electron  
211 microscopy (cryo-EM) structure (Figure 2b) of IgG S728-1157 in complex with spike WT-  
212 6P-Mut7, a version of spike WT-6P possessing interprotomer disulfide bond at C705 and  
213 C883, at ~3.3 Å global resolution (Figure S4e). Using symmetry expansion, focused  
214 classification, and refinement methods, we achieved local resolution at the RBD-Fv  
215 interface to ~4Å (Figure S4e and Table S6). A crystal structure of S728-1157 Fab was  
216 determined at 3.1 Å resolution and used to build the atomic model at the RBD-Fv  
217 interface. Our structures confirm that S728-1157 binds the RBS-A (or class 1) epitope in  
218 the RBD-up conformation (Figure 2b and Figure S4e), similar to other IGHV3-53/3-66  
219 antibodies (Figure 2c). Steric blockage of the angiotensin converting enzyme 2 (ACE2)  
220 binding site by S728-1157 explains its high neutralization potency against SARS-CoV-2.  
221 The <sub>32</sub>NY<sub>33</sub> motif and <sub>53</sub>SGGS<sub>56</sub> motif<sup>36</sup> in S728-1157 CDR-H1 and-H2 interact with the  
222 RBD in almost the same way as CC12.3 (Figure S4b-c). However, V<sub>H</sub> <sub>98</sub>DY<sub>99</sub> in S728-  
223 1157 CDR-H3 forms more extensive interactions including both hydrophobic and polar  
224 interactions with the RBD, compared to V<sub>H</sub> <sub>98</sub>DF<sub>99</sub> in CC12.3 (Figure 2d and Table S5).  
225 The diglycine V<sub>H</sub> <sub>100</sub>GG<sub>101</sub> in S728-1157 CDR-H3 may also facilitate more extensive  
226 binding compared to V<sub>H</sub> Y<sub>100</sub> in CC12.3 likely due to the flexibility in the glycine residues  
227 that lead to a different conformation of the tip of the CDR-H3 loop and a relative shift of  
228 residues at <sub>98</sub>DY<sub>99</sub>.

229 Although the Omicron VOCs have extensive mutations in the RBD (Figure 2c and  
230 Figure S2a), most of these residues do not make interactions with or are dispensable for

231 binding to S728-1157, as binding is still observed (Figure S4a). From our spike WT-6P-  
232 Mut7 + Fab S728-1157 model, Y505 to V<sub>L</sub> Q31, and E484 to V<sub>H</sub> Y99 are predicted to make  
233 hydrogen bonds (Figure S4d and Table S5), which have the potential to be disrupted by  
234 Omicron mutations Y505H and E484A. However, a Y505H mutation would still allow for  
235 a hydrogen bond with V<sub>L</sub> Q31 and an E484A mutation would add another hydrophobic  
236 side chain near hydrophobic residues V<sub>L</sub> Y99, F456, and Y489. These contacts may  
237 explain the mechanism which enabled S728-1157 to retain neutralizing activity (Figure  
238 1g), albeit reduced binding reactivity against spike BA.1 antigen, which is in turn possibly  
239 due to the function of Omicron mutations in altering the conformational landscape of the  
240 spike protein<sup>40</sup>. Notably, while the variable genes were well-mutated, all but one of the  
241 contact residues between the CDR-H3 of S728-1157 and the VOC were predicted to be  
242 germline encoded and not introduced by somatic mutations, likely limiting the number of  
243 existing memory B cells of this class that could be further adapted by somatic mutation to  
244 protect against VOC strains (Figure S1, Table S5). Overall, our structural studies  
245 revealed the basis of broad neutralization of S728-1157 that can accommodate most  
246 mutations in the SARS-CoV-2 VOCs.

247

### 248 **S728-1157 reduces replication of SARS-CoV-2 Delta and Omicron variants in Syrian** 249 **hamsters**

250 To evaluate the protective efficacy of our broadly neutralizing mAbs, we utilized a golden  
251 Syrian hamster infection model that has been widely used for SARS-CoV-2 infection.  
252 Hamsters received 5 mg/kg of individual mAbs or an irrelevant antigen (ebolavirus  
253 glycoprotein)-specific isotype control via intraperitoneal injection one day post-infection  
254 with SARS-CoV-2 viruses. Lung and nasal tissues were collected at 4 days post-infection  
255 (dpi) (Figure 3a). Therapeutic administration of S728-1157 resulted in reduced titers of  
256 wildtype, BA.1 Omicron and Delta variants in both the nasal turbinates and lungs of  
257 infected hamsters (Figure 3b-d). Interestingly, the effect of S728-1157 in the lungs was  
258 dramatic, reducing wildtype viral loads by  $\sim 10^4$  PFU, and BA.1 Omicron by  $\sim 10^5$  PFU,  
259 with the viral titers of the latter being completely abolished (Figure 3c). In contrast to *in*  
260 *vitro* neutralization, S451-1140 did not reduce BA.1 Omicron viral replication in lung and

261 nasal turbinates, indicating the disconnect between *in vitro* neutralization and *in vivo*  
262 protection for S451-1140 (Figure 3e). In comparison, S626-161 administration resulted in  
263 significant but marginal reductions in lung viral titers following wildtype and BA.1  
264 challenge (Figure 3f-g). These data underscore that to precisely define broadly protective  
265 mAbs, evaluating protection efficacy in parallel with neutralization activity is required.  
266 Overall, S728-1157 represents a promising mAb with broad neutralization efficacy against  
267 SARS-CoV-2 variants that is capable of dramatically reducing wildtype, Delta and BA.1  
268 replication *in vivo*.

269

### 270 **SARS-CoV-2 infection rarely elicits potent S728-1157-like cross-neutralizing mAbs**

271 Given the cross-neutralization and prophylactic potential of S728-1157, we sought to  
272 evaluate whether S728-1157-like antibodies are commonly induced among polyclonal  
273 responses in SARS-CoV-2 patients. To assess this, we performed competition ELISAs  
274 using convalescent serum to detect anti-RBD antibody titers that could compete for  
275 binding with S728-1157 (Figure 4a). Subjects were divided into three groups based on  
276 their magnitude of antibody responses, as defined previously<sup>12,13</sup>. Although high- and  
277 moderate-responders had higher titers of S728-1157-competitive serum antibodies  
278 compared to low-responders (Figure 4b), the titers were quite low across all groups  
279 suggesting that it is uncommon to acquire high levels of S728-1157-like antibodies in  
280 polyclonal serum following wildtype SARS-CoV-2 infection. In addition to S728-1157, we  
281 tested the competition of convalescent serum with other mAbs, including S451-1140 and  
282 S626-161, LY-CoV555, REGN10933, CR3022, and CC12.3. Similar to S728-1157, we  
283 observed relatively low titers of antibodies competing with S451-1140, S626-161, LY-  
284 CoV555, REGN10933 and CC12.3 in polyclonal serum from most of the convalescent  
285 individuals (Figure 4c-f, h). Nonetheless, high-responders tended to have significantly  
286 higher titers against those neutralizing mAbs than low-responders (Figure 4b-f, h). In  
287 contrast, antibodies targeting the CR3022 epitope site were more pronounced in  
288 convalescent individuals, suggesting the enrichment of class 4 RBD antibodies in  
289 polyclonal serum (Figure 4g). Notably, there was no difference in titers of CR3022 across  
290 the three responder groups, suggesting that CR3022-site antibodies were largely induced

291 during wildtype SARS-CoV-2 infection. Interestingly, as compared to CC12.3, S728-1157  
292 was detected at 4-fold lower levels in the serum of high-responders. Thus, despite class  
293 1 antibodies being frequently induced by natural infection and vaccination<sup>17,26,27,41-44</sup>, our  
294 data suggest that S728-1157-like antibodies represent a subset of this class that are  
295 comparatively rare.

296 Lastly, we examined the difference in reactivity to 2P- versus 6P-stabilized spike  
297 in our convalescent cohort sera (Figure 4i-k). We found that all three responder groups  
298 mounted anti-spike reactive antibodies against 6P-stabilized spike wildtype to a greater  
299 extent than 2P-stabilized spike wildtype, by a factor of 6 to 11-fold (Figure 4j), indicating  
300 that the major antigenic epitopes were better exhibited or stabilized on 6P-stabilized  
301 antigen. Using the same samples, high and moderate responders also had lower anti-  
302 spike antibodies against BA.1-2P than BA.1-6P, by 4 to 5-fold (Figure 4k). Of note, low  
303 responders had a smaller fold change in binding reactivity against spike BA.1 Omicron-  
304 2P and 6P (2-fold reduction) compared to wildtype-2P and 6P spike (11-fold reduction)  
305 (Figure 4j-k), suggesting that serum antibody against BA.1 Omicron-reactive epitopes  
306 may be limited in low responder subjects. Overall, these data suggest that there is  
307 improved polyclonal binding induced by natural infection to 6P-stabilized spike, both for  
308 wildtype and Omicron viruses.

309

## 310 Discussion

311 In this study, we identify three potent bnAbs isolated from memory B cells of  
312 individuals who had recovered from SARS-CoV-2 infection during the initial wave of the  
313 COVID-19 pandemic. Among them, S728-1157 maintains substantial binding reactivity  
314 and had consistent neutralizing activity against all tested SARS-CoV-2 VOC including  
315 Omicron BA.1, BA.2, BA.2.75, BL.1 (BA.2.75+R346T), BA.4 and BA.5, and was able to  
316 substantially reduce infectious viral titers following Delta and BA.1 infection in hamsters.

317 We found convalescent serum from our cohort contained low concentrations of  
318 antibodies that compete with S728-1157 (a class 1 antibody) and class 2 epitope mAbs.  
319 This suggests that S728-1157 is somewhat unique from other antibodies targeting class  
320 1 epitopes and is infrequently induced in the RBD-specific memory B cells pool. Instead,

321 in our cohort natural infection preferably induced antibodies targeting the CR3022 (class  
322 4) epitope; antibodies of this specificity are also often non-neutralizing or less potently  
323 neutralizing than RBS-targeting antibodies. These data are complementary to our  
324 previous findings that demonstrated that an abundance of class 3 antibodies in  
325 convalescent sera may contribute to neutralizing activity against Alpha and Gamma  
326 variants, whereas a lack of class 2 antibodies may account for reduced neutralization  
327 capability against Delta<sup>12</sup>. Notwithstanding, the breadth of activity against Omicron  
328 variants of most of these RBS-targeting antibodies (RBS-A/class 1, RBS-B,C/class 2 and  
329 RBS-D/class 3) is reported to be highly limited<sup>10,39,45</sup>. This is consistent with experimental  
330 evidence documenting that convalescent unvaccinated patients showed a marked  
331 reduction of neutralizing activity against Omicron BA.1<sup>9</sup>. This phenomenon highlights the  
332 need to shape the antibody repertoire toward broadly conserved, protective epitopes, as  
333 typified by S728-1157.

334 The structures herein illustrated that S728-1157 bound the RBS-A/class 1 epitope  
335 in the 'up' conformation RBD. This epitope is more readily accessible on 6P-stabilized  
336 spikes, which present two RBDs in the 'up' state, as compared to 2P spikes which  
337 presents only one<sup>28,31,46,47</sup>. The S728-1157 was isolated after natural infection; in such  
338 contexts, the odds of inducing S728-1157-like clones are likely higher given that the RBD  
339 must be able to adopt an up conformation, even transiently, to bind to ACE2, thereby  
340 exposing this epitope. Using extensive interactions between CDR-H3 and the RBD, S728-  
341 1157 can accommodate key mutations in VOC spikes, indicating this antibody is unlike  
342 majority of IGHV3-53/3-66 RBS-A/class 1 antibodies<sup>27,48,49,50</sup>. S728-1157 also uses a  
343 different light chain (IGLV3-9) compared to other non-broad antibodies such as CC12.3  
344 (IGKV3-20), which may affect overall binding conformation; however, our analysis  
345 indicates that there is limited direct interaction between the S728-1157 light chain and the  
346 RBD. Most of the CDR-H3 contact residues critical for VOC cross-reactivity in this  
347 interaction are germline-encoded and not introduced by somatic mutations, suggesting  
348 that most memory B cells encoding IGHV3-53/66 class antibodies could not acquire this  
349 degree of cross-reactivity by further affinity maturation, which is a consideration for  
350 vaccines tailored to help induce such antibodies. While it may be challenging to design

351 vaccines that can specifically elicit S728-1157-like antibodies with select CDR-H3s  
352 capable of overcoming the VOC mutations, it is encouraging that IGHV-gene restriction  
353 is observed in other potent SARS-CoV-2 neutralizing mAbs studies<sup>12,17-25</sup>. Ultimately,  
354 such a vaccination approach may be feasible through iterative immunization with  
355 optimized RBD immunogens, as has been previously reported in the influenza literature<sup>51-  
356 55</sup>.

357         Although many mutations have been observed in the class 1 antigenic site<sup>15</sup>, with  
358 regards to the S728-1157 epitope 13/15 total RBD contact residues, and 2/3 CDR-H3-  
359 bound RBD contact residues, are conserved within Omicron and all other VOCs. This  
360 suggests that the RBD region where the S728-1157 epitope is found may include  
361 residues critical for its dynamic function and viral fitness and would therefore be less  
362 tolerant of mutations and antigenic drift than surrounding class 1 site residues. If this is  
363 the case, the tendency for this particular epitope to be lost as viral variants evolve should  
364 be reduced, making characterization of S728-1157 and similar antibodies and epitopes  
365 important for variant-resistant vaccines or mAb therapeutic development.

366         In summary, our study identifies broadly neutralizing antibodies that may inform  
367 immunogen design for next-generation variant-proof coronavirus vaccines or serve as  
368 mAb therapeutics that are resistant to SARS-CoV-2 evolution. In particular, in terms of  
369 combined potency and breadth, S728-1157 appears to be the best-in-class antibody  
370 isolated to date. Given that this antibody is predicted to be preferentially induced by 6P-  
371 stabilized recombinant spike proteins or whole virus, these findings suggest that  
372 hexaprolin modification could benefit future vaccine constructs to optimally protect  
373 against future SARS-CoV-2 variants and other sarbecoviruses.

374

### 375 **Acknowledgements**

376 We thank the study participants for their willingness to enroll in this study. We are grateful  
377 for the clinical staff at the University of Chicago Medicine Plasma Transfusion Program  
378 for their assistance in collecting the sample and transfer to the lab. We also kindly thank  
379 the University of Chicago CAT Facility (RRID SCR\_017760) and the University of Chicago  
380 Genomics Facility (RRID SCR\_019196) for assisting in sorting and sequencing samples.

381 We thank Henry Tien for technical support with the crystallization robot, and Robyn  
382 Stanfield for assistance in data collection. We thank Jeffrey Copps for producing the spike  
383 proteins used for electron microscopy. We thank Bill Anderson and Charles Bowman for  
384 maintaining the microscope facility and for technical assistance. We are grateful to the  
385 staff of the Stanford Synchrotron Radiation Lightsource (SSRL) beamline 12-1 for  
386 assistance. Use of resources of the SSRL, SLAC National Accelerator Laboratory is  
387 supported by the U.S. Department of Energy, Office of Science, Office of Basic Energy  
388 Sciences under Contract No. DE-AC02–76SF00515. Extraordinary facility operations  
389 were supported in part by the DOE Office of Science through the National Virtual  
390 Biotechnology Laboratory, a consortium of DOE national laboratories focused on the  
391 response to COVID-19, with funding provided by the Coronavirus CARES Act. The SSRL  
392 Structural Molecular Biology Program is supported by the DOE Office of Biological and  
393 Environmental Research, and by the National Institutes of Health, National Institute of  
394 General Medical Sciences (including P41GM103393).

395

#### 396 **Author contributions**

397 Conceptualization, SC, PCW; Methodology, SC, PJH, HL, JLT, GO, JT, MH, SAE, YF,  
398 DW; Sample Collection, NYZ, HLT; Resources, GS, FK, DNS, IAW, ABW, YK.  
399 Investigation, SC, PJH, HL, JLT, JJM, LL, MK, TM; Writing – Original Draft, SC, HL, JLT;  
400 Writing – Review and Editing, all authors; Funding, PCW, FK, DNS, IAW, ABW, YK.  
401 Supervision, PCW, IAW, ABW, YK.

402

#### 403 **Declaration of Interests**

404 The University of Chicago has filed a patent application on November 11, 2021, relating  
405 to anti-SARS-CoV-2 antibodies with P.C.W. and S.C. as inventors. Some of mAbs in this  
406 study are being considered for the development of therapeutic antibodies. The Icahn  
407 School of Medicine at Mount Sinai has filed patent applications relating to SARS-CoV-2  
408 serological assays and NDV-based SARS-CoV-2 vaccines, which list F.K. as a  
409 coinventor. Mount Sinai has spun out a company, Kantaro, to market serological tests for  
410 SARS-CoV-2. F.K. has consulted for Merck and Pfizer (before 2020) and is currently

411 consulting for Pfizer, Seqirus, Third Rock Ventures and Avimex. The Krammer laboratory  
412 is also collaborating with Pfizer on animal models of SARS-CoV-2.

413

#### 414 **Funding information**

415 This project was funded in part by the National Institute of Allergy and Infectious Diseases  
416 (NIAID; National Institutes of Health grant numbers U19AI082724 (PCW), U19AI109946  
417 (PCW), U19AI057266 (PCW), the NIAID Centers of Excellence for Influenza Research  
418 and Surveillance (CEIRS) grant number HHSN272201400005C (PCW), and the NIAID  
419 Centers of Excellence for Influenza Research and Response (CEIRR) grant number  
420 75N93019R00028 (PCW). This work was also partially supported by the NIAID  
421 Collaborative Influenza Vaccine Innovation Centers (CIVIC; 75N93019C00051, PCW).  
422 Y.K. and P.C.W. were funded by NIAID's Pan-Coronavirus Vaccine Development  
423 Program (P01AI165077). Y.K. was also funded by the Research Program on Emerging  
424 and Re-emerging Infectious Diseases (JP19fk0108113, JP20fk0108272,  
425 JP20fk0108301, and JP21fk0108586); the Japan Program for Infectious Diseases  
426 Research and Infrastructure (JP20wm0125002) from the Japan Agency for Medical  
427 Research and Development (AMED); NIAID CEIRS contract HHSN272201400008C.  
428 D.N.S. was funded by BEI/NIAID contract HHSN272201600013C. I.A.W and A.B.W. were  
429 supported by the Bill and Melinda Gates Foundation award INV-004923. Work in the  
430 Krammer laboratory was funded by the NIAID Collaborative Influenza Vaccine Innovation  
431 Centers (CIVIC) contract 75N93019C00051. In addition, this work was also partially  
432 funded by the NIAID Centers of Excellence for Influenza Research and Surveillance  
433 (CEIRS, contract # HHSN272201400008C), the NIAID Centers of Excellence for  
434 Influenza Research and Response (CEIRR, contract# 75N93021C00014) and by  
435 anonymous donors. The content is solely the responsibility of the authors and does not  
436 necessarily represent the official views of the National Institutes of Health.

437

438



439 **Main Figures and Legends**

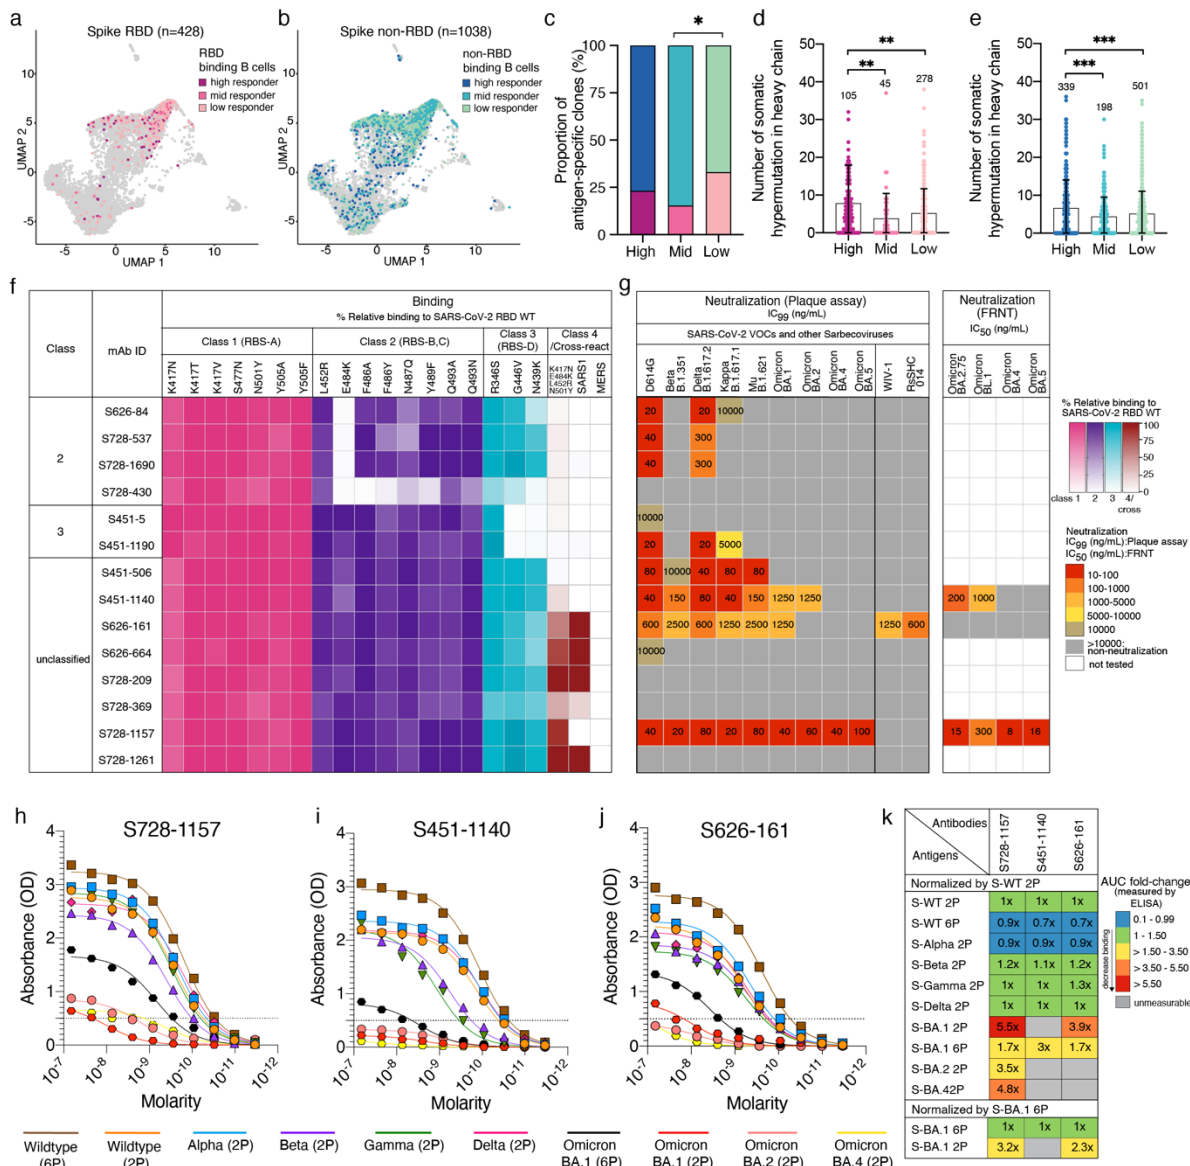

440

441 **Figure 1. Proportion of SARS-CoV-2-specific B cells and characterization of RBD-**  
 442 **reactive mAbs isolated from COVID-19 convalescent individuals. a-b,** Uniform  
 443 **manifold approximation and projection (UMAP) of SARS-CoV-2 (a) spike RBD binding**  
 444 **and (b) spike non-RBD binding B cells isolated from convalescent subjects that could be**  
 445 **characterized into 3 groups (high, mid and low responder) based on their serological**  
 446 **response against SARS-CoV-2 spike<sup>13</sup>. c,** Proportion of spike non-RBD- and spike RBD-  
 447 **specific binding B cells representing in each responder group. Colors in a and b are**  
 448 **representative of antigen-specific B cells from each responder group as follow: (a) RBD-**

449 binding B cells; plum, high responder; pink, mid responder; pale-pink, low responder and  
450 **(b)** non-RBD-binding B cells; navy, high responder; blue, mid responder; pale-green, low  
451 responder. **d-e**, Number of somatic hypermutations in the IGHV in antibodies targeting  
452 **(d)** RBD and **(e)** non-RBD. **f**, Binding profile of RBD-reactive mAbs against single RBD  
453 mutants associated with different antibody classes, a combinatorial RBD mutant, and the  
454 RBDs of SARS-CoV-1 and MERS-CoV. Color gradients indicate relative binding  
455 percentage compared to RBD WT with the labeling color as follow: pink, class 1; purple,  
456 class 2; teal, class 3; burgundy, class 4 and cross-reactive epitopes. **g**, Neutralization  
457 potency measured by plaque assay (complete inhibitory concentration; IC<sub>99</sub>) and focus  
458 reduction neutralization test (FRNT; half inhibitory concentration; IC<sub>50</sub>) of RBD-reactive  
459 mAbs to SARS-CoV-2 variants and sarbecoviruses. Binding breadth against full-length  
460 spike SARS-CoV-2 variants determined by ELISA is shown for **(h)** S728-1157, **(i)** S451-  
461 1140, and **(j)** S626-161. Dashed line in **h-j** indicate the limit of detection. **k**, Heatmap  
462 represents area under curve (AUC) fold-change of broadly neutralizing RBD-reactive  
463 mAbs against ectodomain spike SARS-CoV-2 variants relative to WT-2P and the  
464 differences of AUC fold-change between spike BA.1-2P relative to spike BA.1-6P. Colors  
465 in **k** indicate range of fold-change from blue, 0.1 to 0.99-fold (increase affinity binding);  
466 green, 1 to 1.5-fold (none to little reduction in affinity binding); yellow, >1.5 to 3.5-fold  
467 (moderate reduction in affinity binding); orange, >3.5 to 5.5-fold (high reduction in affinity  
468 binding); red, >5.5-fold (extreme reduction in affinity binding) and grey indicated  
469 unmeasurable fold-change due to the absorbance values are below limit of detection. The  
470 statistical analysis in **c** was determined using Tukey multiple pairwise-comparisons and  
471 in **d-e** was determined using Kruskal-Wallis with Dunn's multiple comparison test. Data  
472 in **f-g and h-j** are representative of two independent experiments performed in duplicate.  
473 Genetic information for each antibody is in **Table S2**. The SARS-CoV-2 viruses used in  
474 neutralization assay are indicated in **Table S4**.

475

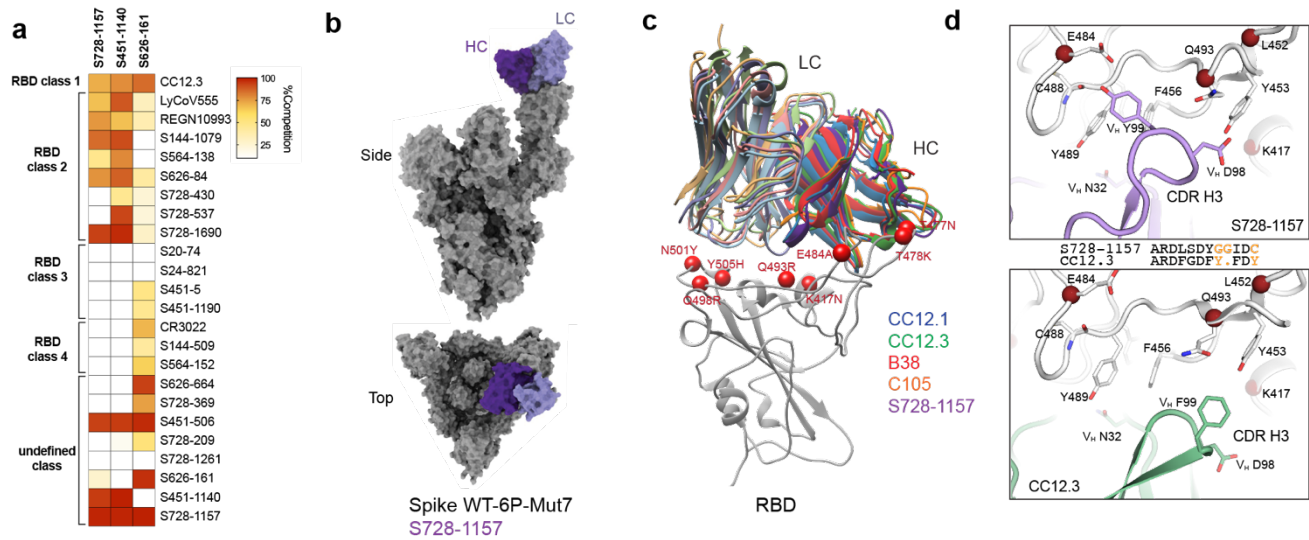

476

477 **Figure 2: Mechanism of broad neutralization of S728-1157.** (a) Epitope binning of  
478 broadly neutralizing RBD-reactive mAbs. Heatmap demonstrating the percentage of  
479 competition between each RBD-reactive mAb from previous studies<sup>12,20,33-35</sup> with three  
480 broadly neutralizing mAbs, S728-1157, S451-1140 and S626-161. Data are  
481 representative of two independent experiments performed in triplicate. (b) Surface  
482 representation of the model derived from the cryoEM map of spike WT-6P-Mut7 in  
483 complex with IgG S728-1157. The heavy chain is shown in dark purple, light chain in light  
484 purple, and the spike protein in gray. Although we observe full mAb occupancy in the  
485 cryo-EM map, only one Fv is shown here. (c) Structural comparison of S728-1157 to other  
486 RBS-A antibodies such as CC12.1 (PDB ID: 6XC2, blue), CC12.3 (PDB ID: 6XC4, green),  
487 B38 (PDB ID: 7BZ5, red), and C105 (PDB ID: 6XCN, orange). The heavy chains are a  
488 darker shade, and the light chains are a lighter shade of their respective colors. Omicron  
489 BA.1 mutations near the epitope interface are shown as red spheres. (d) CDR-H3 forms  
490 distinct interactions with SARS-CoV-2 RBD between S728-1157 and CC12.3. Sequence  
491 alignment of CDR-H3 of the two antibodies are shown in the middle with non-conserved  
492 residues shown in orange.

493

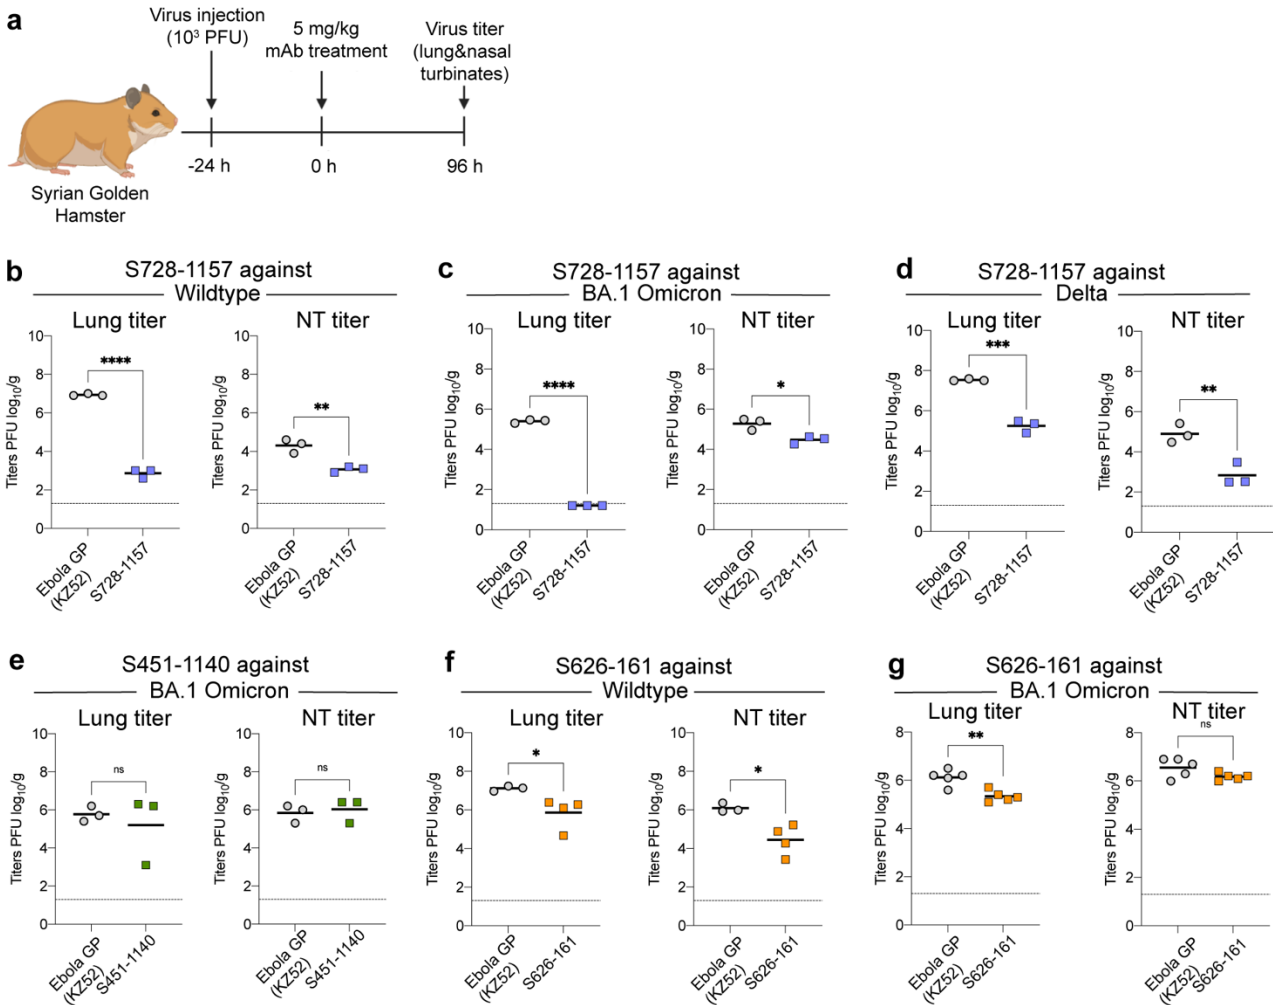

494

495 **Figure 3: Protective efficacy of broadly neutralizing antibodies against SARS-CoV-**

496 **2 infection in hamster.** Schematic illustrating the in vivo experiment schedule **(a)**. Lung

497 and nasal turbinate (NT) viral replication SARS-CoV-2 are shown for hamster treated

498 therapeutically with **(b-d)** S728-1157 (n=3) **(e)** S451-1140 (n=3) and **(f-g)** S626-161 (n=4)

499 at day 4 post-challenge with SARS-CoV-2 compared with control mAb, anti-Ebola surface

500 glycoprotein (KZ52) antibody. Dashed horizontal lines represent the limit of detection

501 (LOD) of the experiment. P-values in **(b-g)** were calculated using Unpaired t-test. The

502 infected SARS-CoV-2 viruses are detailed in **Table S4**.

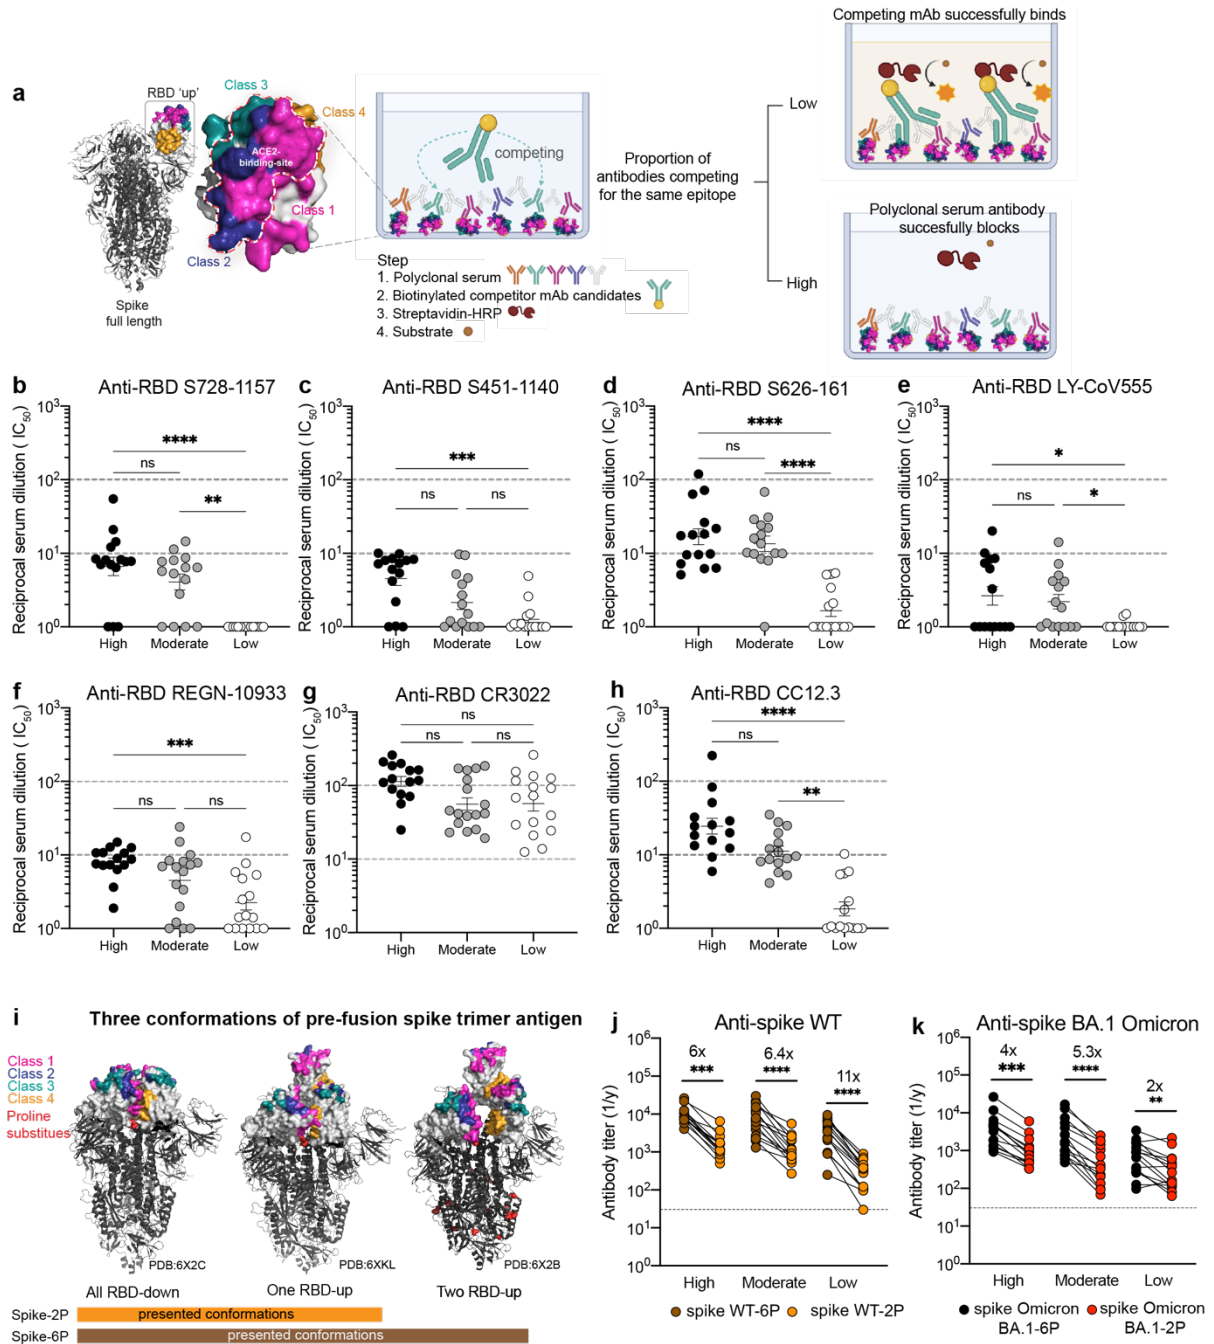

503

504 **Figure 4: Convalescent serum antibody competition with broadly neutralizing RBD-**  
 505 **reactive mAbs and comparison of serum antibody response against spike 6P-**  
 506 **versus 2P-stabilized.** Schematic diagram for experimental procedure of serum  
 507 competitive ELISA **(a)**. Half-maximal inhibitory concentration ( $EC_{50}$ ) of polyclonal  
 508 antibody serum from convalescent individuals that could compete with broadly  
 509 neutralizing mAbs (competitor mAb): S728-1157 **(b)**, S451-1140 **(c)** and S626-161 **(d)**,

510 therapeutic neutralizing mAbs LY-CoV555 **(e)**, REGN-10933 **(f)**, non-neutralizing mAb  
511 CR3022 **(g)** and well-defined class 1 mAb CC12.3 **(h)**. The reciprocal serum dilutions in  
512 **b-h** are showed as Log<sub>10</sub>P of the IC<sub>50</sub> of serum dilution that can achieve 50% competition  
513 with the competitor mAb of interest. The statistical analysis in **b-h** was determined using  
514 Kruskal-Wallis with Dunn's multiple comparison test. Representative three conformations  
515 of pre-fusion spike trimer antigen observed in the previous structural characterization of  
516 SARS-CoV-2 stabilized by 2P and 6P<sup>31,47</sup> **(i)**. Endpoint titer of convalescent sera against  
517 SARS-CoV-2 spike wildtype (WT) **(j)** and Omicron BA.1 **(k)** in two versions of spike  
518 substituted by 2P and 6P. Data in **b-h** and **j-k** are representative of two independent  
519 experiments performed in duplicate. Wilcoxon matched-pairs signed rank test was used  
520 to compare the anti-spike antibody titer against 2P and 6P in **j-k**. Fold change indicated  
521 in **j-k** is defined as the mean fold change.  
522  
523

## 524 Supplementary Figures and Tables

525

### S728-1157

|                                                  |                                                                                             |     |     |     |
|--------------------------------------------------|---------------------------------------------------------------------------------------------|-----|-----|-----|
| Heavy chain                                      | FR1                                                                                         | FR2 | FR3 | FR4 |
| <-----CDR1-----><-----CDR2-----><-----CDR3-----> |                                                                                             |     |     |     |
| Sequence                                         | R N Y M N I I Y S G G S T F Y A D S V E G D L S D Y G G I D C                               |     |     |     |
| V IGHV3-66*02                                    | AGAAATACATGAACATTATTATAGTGGTGGCAGCACATTCTACGCAGACTCCGTGGAGGGCGATCTCTCCGACTACGGTGGGATTGACTCC |     |     |     |
| D IGHJ4-23*01                                    | .C.C.....G.G.....C.....T.....A.....A.....                                                   |     |     |     |
| J IGHJ4*02                                       | .....A.....                                                                                 |     |     |     |
| Light chain                                      | FR1                                                                                         | FR2 | FR3 | FR4 |
| <-----CDR1-----><-----CDR2-----><-----CDR3-----> |                                                                                             |     |     |     |
| Sequence                                         | G G D N V G S Q N V H R D S N R P S Q V W D S S T V A                                       |     |     |     |
| V IGLV3-9*01                                     | GGGGAGACACCTGGGAAGTCAAAATGTGCACAGGGATAGCAACCGGCCCTTCAGGTGTGGGACGACGACTGTGGCT                |     |     |     |
| J IGLJ2*01                                       | .....A.....A.T.....A.....                                                                   |     |     |     |

### S451-1140

|                                                  |                                                                                                   |     |     |     |
|--------------------------------------------------|---------------------------------------------------------------------------------------------------|-----|-----|-----|
| Heavy chain                                      | FR1                                                                                               | FR2 | FR3 | FR4 |
| <-----CDR1-----><-----CDR2-----><-----CDR3-----> |                                                                                                   |     |     |     |
| Sequence                                         | N Y A M T A I S G G G S T D Y A D S V K G D L F G S G W S L F D N                                 |     |     |     |
| V IGHV3-23*04                                    | AACATGCCATGACCGCTATTAGTGGTGGTGGGAGCACAGACTACGCAGACTCCGTGAAGGGCGATCTATTCCGACGTGGCTGGTCCCTTTGACAAAC |     |     |     |
| D IGHJ6-19*01                                    | .G.....G.....A.....T.....T.....                                                                   |     |     |     |
| J IGHJ4*02                                       | .....T.....                                                                                       |     |     |     |
| Light chain                                      | FR1                                                                                               | FR2 | FR3 | FR4 |
| <-----CDR1-----><-----CDR2-----><-----CDR3-----> |                                                                                                   |     |     |     |
| Sequence                                         | K S S Q S V L Y S S N N K N Y L A W A S T R E S Q Q Y Y S P P I T                                 |     |     |     |
| V IGKV4-1*01                                     | AAGTCCAGCCAGAGTGTCTTATACAGTCCAACAATAAGAAGTACTTAGCTTGGGCATCTACCCGGGAATCCAGCAATATTATAGTCCCTCTATCACT |     |     |     |
| J IGKJ3*01                                       | .....T.....                                                                                       |     |     |     |

### S626-161

|                                                  |                                                                                                                       |     |     |     |
|--------------------------------------------------|-----------------------------------------------------------------------------------------------------------------------|-----|-----|-----|
| Heavy chain                                      | FR1                                                                                                                   | FR2 | FR3 | FR4 |
| <-----CDR1-----><-----CDR2-----><-----CDR3-----> |                                                                                                                       |     |     |     |
| Sequence                                         | T S N Y Y W G S I Y Y R G G T H Y N P S L K T H T Y F Y D I V G A A V W E P F D I                                     |     |     |     |
| V IGHV4-39*01                                    | ACTAGTAATTACTACTGGGGCAGTATCTATTATCGTGGGGCACCCTACAACCCCTCCCTCAAGACTCATACCTATTTCTATGATATCGTGGGGCAGCGTTTGGGAACCTTTGATATC |     |     |     |
| D IGHJ3-22*01                                    | .G.....G.....A.....A.....T.....G.....A.....                                                                           |     |     |     |
| J IGHJ3*02                                       | .....A.....                                                                                                           |     |     |     |
| Light chain                                      | FR1                                                                                                                   | FR2 | FR3 | FR4 |
| <-----CDR1-----><-----CDR2-----><-----CDR3-----> |                                                                                                                       |     |     |     |
| Sequence                                         | R A S Q S V S S S Y L A D A S S R A T Q Q Y G S S P P W T                                                             |     |     |     |
| V IGKV3-20*01                                    | AGGGCCAGTCAGAGTGTAGCAGCAGCTACTTAGCCGATGCATCCAGCAGGGCCACTCAGCAGTATGGTAGCTCACCTCCSTGGACG                                |     |     |     |
| J IGKJ1*01                                       | .....G.....                                                                                                           |     |     |     |

526

527 **Figure S1: Amino acid and nucleotide sequences of complementarity-determining**

528 **region (CDR) of heavy chain and light chain of the three bnAbs.** Contacting residues

529 within CDR of S728-1157 and SARS-CoV-2 are highlighted as light purple. Genetic

530 information for each antibody is in **Table S2**.

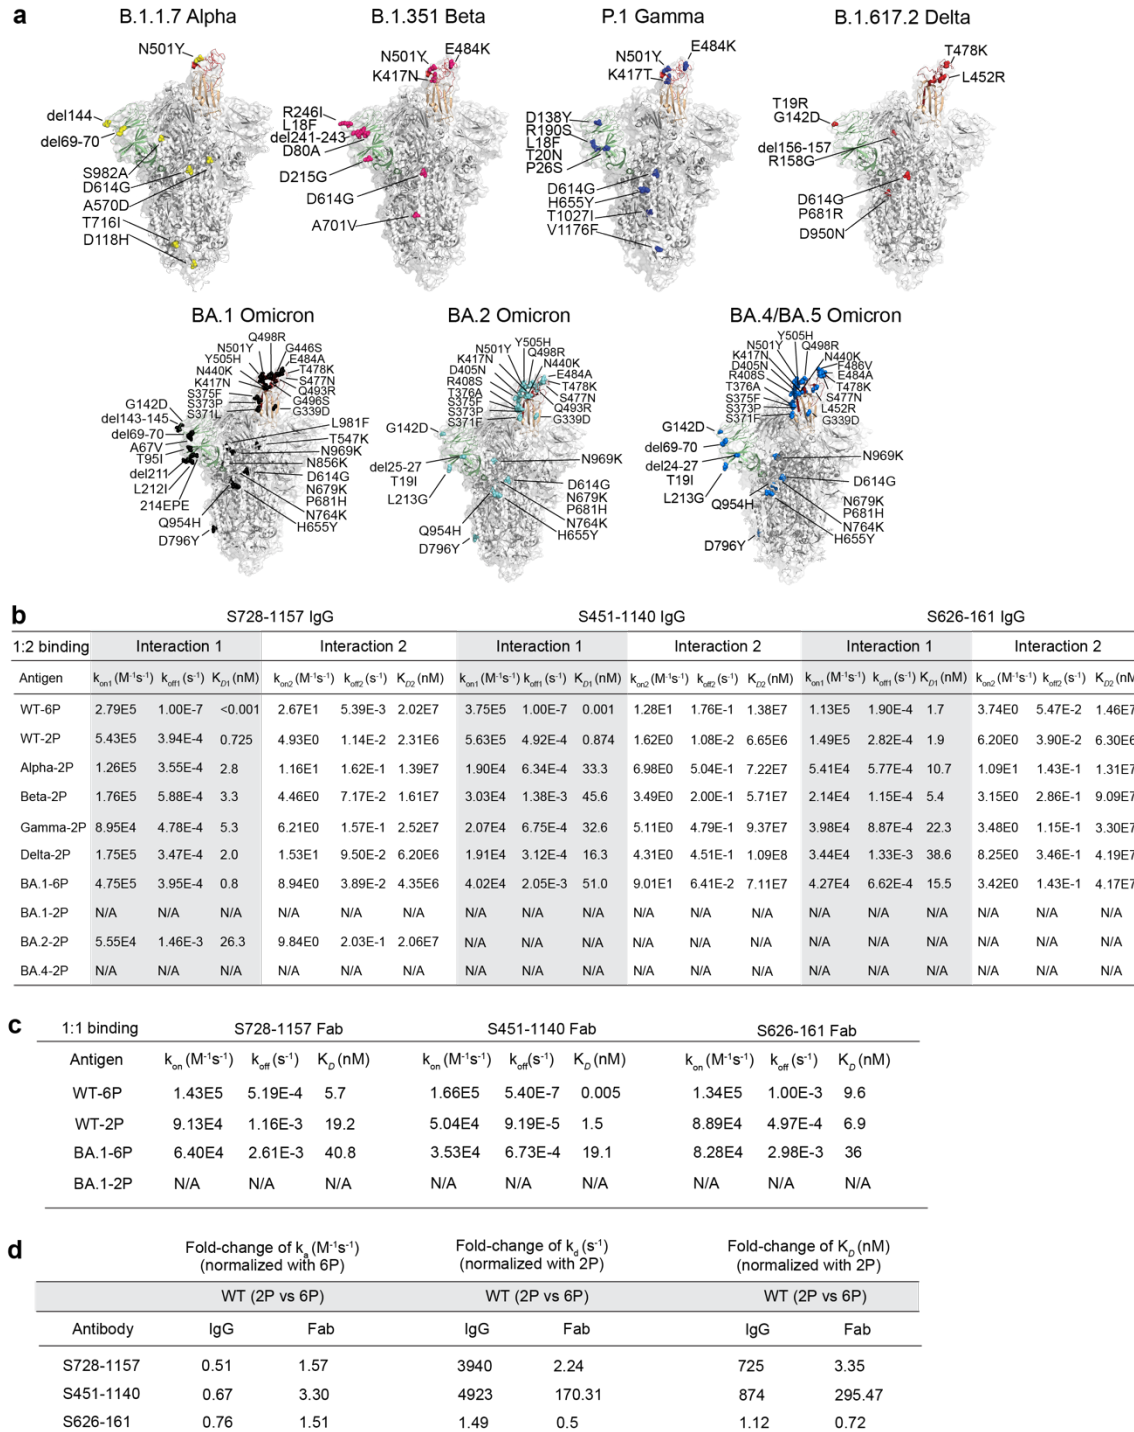

**Figure S2: Broadly neutralizing RBD-reactive mAbs activity against SARS-CoV-2 and emerging variants.** **a**, Structural models for the full-length spike protein variants and amino acid substitutions that encoded in B.1.1.7 Alpha, B.1.351 Beta, P.1 Gamma, B.1.617.2 Delta and Omicron, BA.1, BA.2 and BA.4. The structural models in **a** are modified from PDB ID: 6XM4. **b**, The table illustrating the binding rate and equilibrium



constants ( $k_{on}$ ,  $k_{off}$ , and affinity binding  $K_D$ ) measured by BLI of S728-1157, S451-1140 and S626-161 IgG in response to the panel of SARS-CoV-2 VOCs (either former or current VOCs). **c**, The binding rate comparison of Fabs of S728-1157, S451-1140 and S626-161 in responding to spike WT and BA.1-6P and 2P constructs. The binding traces of IgG and Fab analyzed by BLI were represented by the 1:2 and 1:1 interaction model, respectively. **d**, The fold-change of binding rate ( $K_{on}$ ,  $K_{off}$ ) and binding affinity ( $K_D$ ) between spike WT-6P and spike WT-2P bound by neutralizing RBD-reactive mAbs, whole IgG form and Fab. Data in **c-d** are representative of two independent experiments, the data from experiments that have the best fit ( $R^2 > 0.90$ ) are selected for analysis.

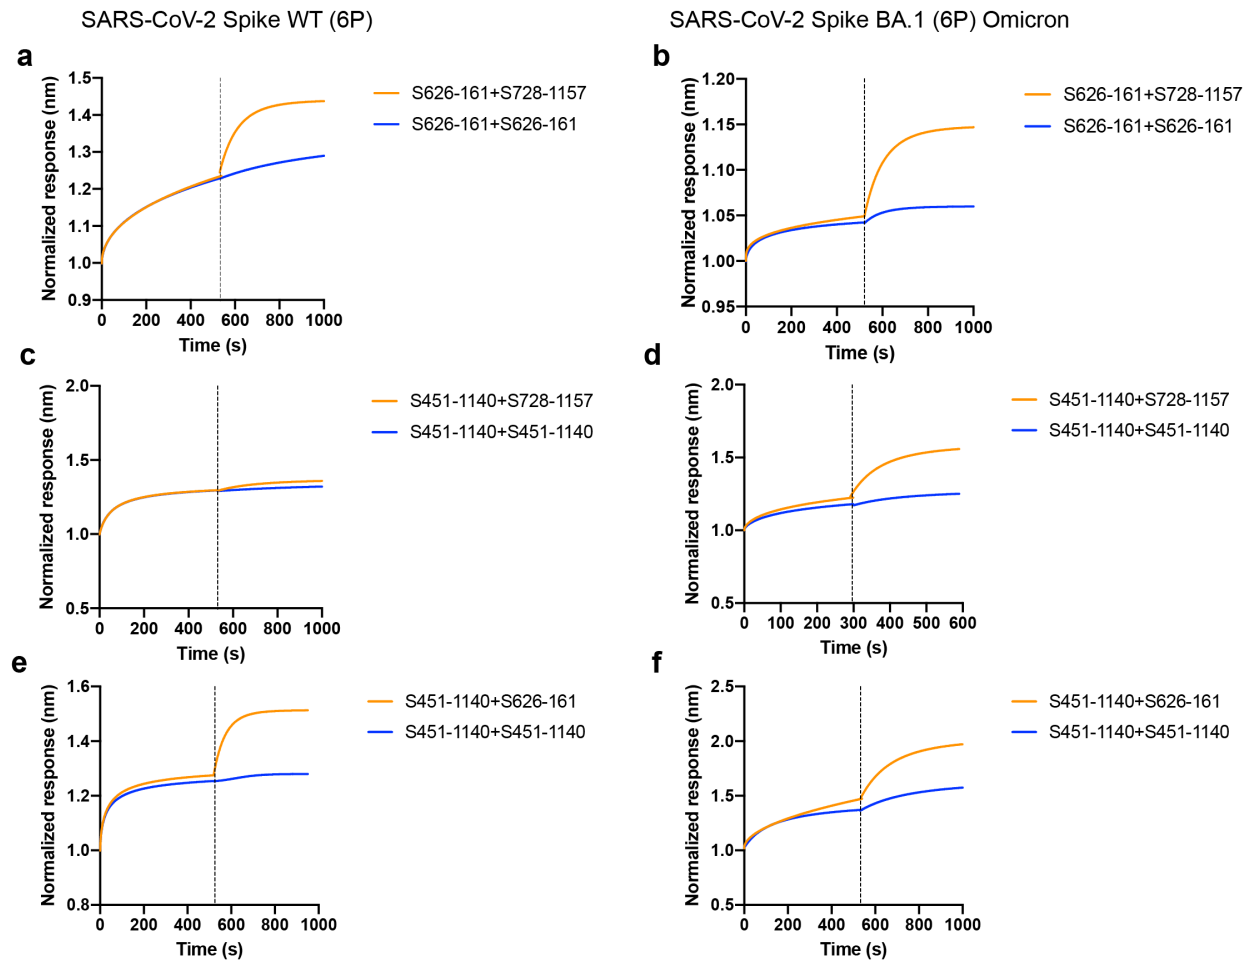

**Figure S3: Bi-layer interferometry analysis demonstrates binding affinity curves of three broadly neutralizing mAbs competing with each other in response to biotinylated spike wildtype (WT)-6P (left panel) and spike BA.1 Omicron-6P (right panel). a-b, S626-161 was firstly bound, followed by S728-1157 mAb as competing mAb. c-d, S451-1140 was firstly bound and competed with S728-1157 and e-f, S626-161. The response curve was normalized in relation to its starting response value.**

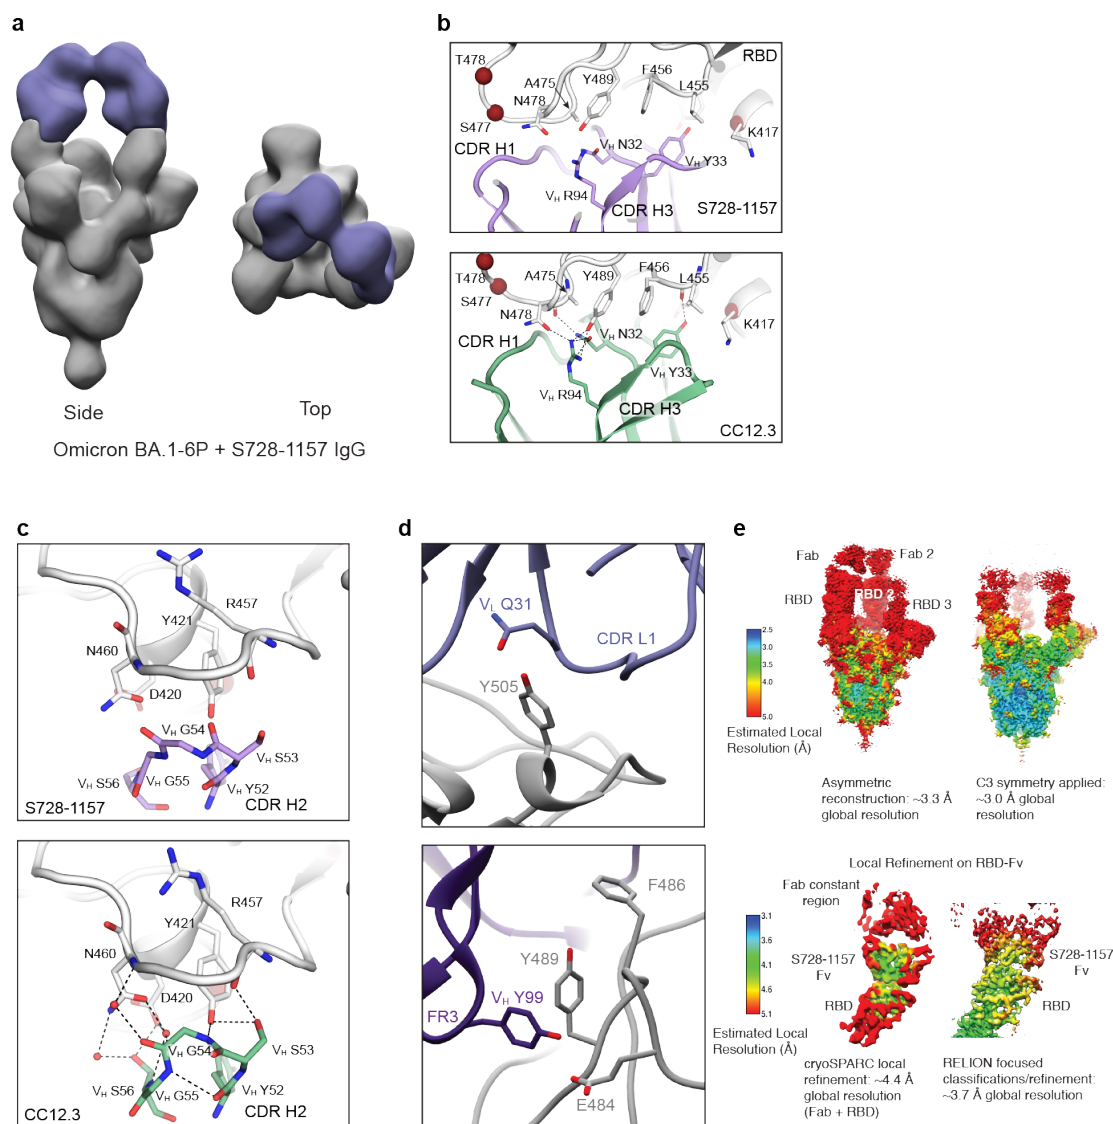

**Figure S4. Structural analysis of S728-1157 binding to SARS-CoV-2 spike. (a)** Three-dimensional (3D) reconstruction of Omicron BA.1-6P in complex with IgG S728-1157 shows binding by negative stain electron microscopy. The binding mode is the same as binding to spike WT-6P-Mut7 shown in **Figure 2b**. **(b)** CDR-H1 of S728-1157 forms similar interactions with SARS-CoV-2 RBD compared to another IGHV3-53 antibody CC12.3 (PDB ID: 6XC4). **(c)** CDR-H2 of S728-1157 forms similar interactions with the RBD compared to CC12.3 (PDB ID: 6XC4). **(d)** For spike WT-6P-Mut7 in complex with S728-1157, residues Y505 and V<sub>L</sub> Q31, and E484 and V<sub>L</sub> Y99 are predicted to make hydrogen bonds. Hydrophobic residues Y486 and Y489 are shown as well. Since S728-1157 binds spike Omicron BA.1-6P in the same way as to spike WT-6P-Mut7, it may

accommodate the E484A and Y505H mutations in Omicron. (e) Local resolution estimates of the cryo-EM map (upper panel) and local refinement on the RBD-Fv after symmetry expansion using RELION (lower panel).

**Table S1: COVID-19 convalescent subjects. Related to Figure 1 and Figure 4.** The mAbs from high responder subjects, S451, S626, S728 were characterized in this study. Responder group and severity were categorized in a previous study<sup>13</sup>. Serum antibody from each responder group were tested for competition ELISA with broad neutralizing mAbs, other therapeutic mAbs and non-neutralizing mAb.

| Subject ID | Age | Sex | SARS-CoV-2 PCR Test | Duration of symptoms (days) | Symptom start to donation (days) | Responder Category <sup>26</sup> | Severity Category <sup>26</sup> |
|------------|-----|-----|---------------------|-----------------------------|----------------------------------|----------------------------------|---------------------------------|
| 3          | 20  | M   | 3/16/20             | 4                           | 33                               | Low                              | Moderate                        |
| 11         | 66  | M   | 3/30/20             | 16                          | 49                               | High                             | Severe (hospitalized)           |
| 17         | 42  | M   | 3/21/20             | 17                          | 55                               | High                             | Severe                          |
| 19         | 55  | F   | 3/15/20             | 14                          | 44                               | Low                              | Moderate                        |
| 20         | 31  | M   | 3/31/20             | 19                          | 48                               | High                             | Critical (hospitalized)         |
| 22         | 31  | F   | 3/23/20             | 3                           | 31                               | Mid                              | Moderate                        |
| 24         | 34  | M   | 3/23/20             | 12                          | 41                               | High                             | Severe                          |
| 42         | 30  | M   | 3/18/20             | 11                          | 39                               | Mid                              | Moderate                        |
| 63         | 44  | M   | 3/30/20             | 2                           | 33                               | Low                              | Moderate                        |
| 80         | 33  | M   | 3/26/20             | 12                          | 40                               | Mid                              | Moderate                        |
| 89         | 64  | M   | 3/19/20             | 13                          | 43                               | High                             | Mild                            |
| 108        | 58  | M   | 3/15/20             | 11                          | 39                               | High                             | Moderate                        |
| 109        | 34  | M   | 3/15/20             | 9                           | 41                               | Low                              | Moderate                        |
| 112        | 43  | M   | 3/20/20             | 9                           | 40                               | Low                              | Moderate                        |
| 116        | 65  | F   | 3/25/20             | 18                          | 49                               | Low                              | Moderate                        |
| 130        | 52  | M   | 3/26/20             | 7                           | 35                               | Mid                              | Mild                            |
| 135        | 28  | F   | 3/24/20             | 7                           | 36                               | Low                              | Moderate                        |
| 141        | 66  | M   | 3/20/20             | 19                          | 48                               | High                             | Moderate                        |

|            |           |          |                |           |           |             |                                  |
|------------|-----------|----------|----------------|-----------|-----------|-------------|----------------------------------|
| 144        | 56        | M        | 3/16/20        | 23        | 54        | Low         | Moderate                         |
| 156        | 50        | F        | 3/23/20        | 11        | 41        | High        | Moderate                         |
| 166        | 42        | F        | 3/25/20        | 17        | 55        | Low         | Moderate                         |
| 176        | 26        | M        | 3/22/20        | 6         | 35        | Low         | Moderate                         |
| 210        | 47        | M        | 4/4/20         | 7         | 41        | Low         | Moderate                         |
| 218        | 51        | F        | 3/16/20        | 19        | 48        | Mid         | Severe                           |
| 229        | 55        | M        | 3/11/20        | 2         | 42        | Low         | Mild                             |
| 251        | 53        | M        | 3/18/20        | 22        | 51        | Low         | Severe                           |
| 266        | 20        | F        | 3/25/20        | 4         | 32        | Low         | Mild                             |
| 270        | 50        | M        | 3/18/20        | 9         | 39        | Mid         | Moderate                         |
| 272        | 42        | M        | 3/18/20        | 14        | 43        | Mid         | Moderate                         |
| 277        | 65        | M        | 3/18/20        | 13        | 45        | High        | Moderate                         |
| 278        | 52        | F        | 3/12/20        | 12        | 47        | Mid         | Moderate                         |
| 293        | 72        | M        | 3/8/20         | 17        | 63        | High        | Severe<br>(hospitalized)         |
| 305        | 43        | F        | 4/17/20        | 4         | 47        | Low         | Moderate                         |
| 319        | 76        | M        | 3/27/20        | 4         | 36        | High        | Mild                             |
| 332        | 32        | M        | 3/21/20        | 6         | 35        | Mid         | Moderate                         |
| 346        | 30        | M        | 3/16/20        | 11        | 39        | Mid         | Moderate                         |
| 355        | 45        | F        | 3/14/20        | 14        | 44        | Low         | Moderate                         |
| 373        | 48        | M        | 3/16/20        | 7         | 39        | High        | Moderate                         |
| 377        | 44        | M        | 3/14/20        | 9         | 41        | High        | Moderate                         |
| 385        | 33        | M        | 3/11/20        | 7         | 47        | Mid         | Moderate                         |
| 407        | 34        | M        | 4/1/20         | 11        | 43        | Mid         | Moderate                         |
| 433        | 33        | M        | 3/20/20        | 6         | 35        | Low         | Moderate                         |
| 447        | 42        | M        | 4/1/20         | 21        | 61        | High        | Severe                           |
| <b>451</b> | <b>46</b> | <b>M</b> | <b>4/4/20</b>  | <b>11</b> | <b>49</b> | <b>High</b> | <b>Severe<br/>(hospitalized)</b> |
| 537        | 36        | M        | 3/23/20        | 14        | 59        | Mid         | Moderate                         |
| 564        | 24        | F        | 3/19/20        | 32        | 60        | Low         | Severe                           |
| 573        | 25        | M        | 3/20/20        | 17        | 56        | High        | Severe<br>(hospitalized)         |
| <b>626</b> | <b>44</b> | <b>M</b> | <b>3/31/20</b> | <b>19</b> | <b>56</b> | <b>High</b> | <b>Moderate</b>                  |

|     |    |   |         |    |     |      |        |
|-----|----|---|---------|----|-----|------|--------|
| 728 | 62 | F | 3/15/20 | 53 | 130 | High | Severe |
|-----|----|---|---------|----|-----|------|--------|

**Table S2: Characteristics of SARS-CoV-2 RBD-reactive mAbs. Related to Figure**

**1.** Cross-neutralizing mAbs against D614G and B.1.351 Beta, B.1.,617.2 Delta, B.1.617.1 Kappa, B.1.621 Mu, BA.1 Omicron are bolded.

| mAb ID           | Epitope specificity         | VH gene            | VL gene            | # VH SHM  | #VL SHM  | CDR-H3 length | CDR-L3 length |
|------------------|-----------------------------|--------------------|--------------------|-----------|----------|---------------|---------------|
| S451-5           | RBD<br>Class 2              | IGHV2-70*01        | IGLV1-44*01        | 4         | 1        | 12            | 11            |
| S451-506         | RBD<br>Class 3              | IGHV3-53*02        | IGKV1-9*01         | 9         | 4        | 12            | 10            |
| <b>S451-1140</b> | <b>RBD<br/>Unclassified</b> | <b>IGHV3-23*04</b> | <b>IGKV4-1*01</b>  | <b>8</b>  | <b>7</b> | <b>12</b>     | <b>9</b>      |
| S451-1190        | RBD<br>Class 3              | IGHV2-5*02         | IGLV2-14*01        | 8         | 8        | 9             | 11            |
| S626-84          | RBD<br>Class 2              | IGHV1-2*02         | IGLV2-23*02        | 7         | 9        | 16            | 10            |
| <b>S626-161</b>  | <b>RBD<br/>Unclassified</b> | <b>IGHV4-39*01</b> | <b>IGKV3-20*01</b> | <b>8</b>  | <b>2</b> | <b>18</b>     | <b>10</b>     |
| S626-664         | RBD<br>Unclassified         | IGHV4-39*01        | IGLV1-51*02        | 8         | 5        | 19            | 10            |
| S728-209         | RBD<br>Unclassified         | IGHV2-5*04         | IGKV1-12*01        | 14        | 12       | 12            | 9             |
| S728-369         | RBD<br>Unclassified         | IGHV4-31*03        | IGKV1-5*03         | 18        | 13       | 23            | 8             |
| S728-430         | RBD<br>Class 2              | IGHV3-53*01        | IGKV1-33*01        | 1         | 1        | 12            | 10            |
| S728-537         | RBD<br>Class 2              | IGHV1-2*02         | IGKV1-12*01        | 15        | 9        | 17            | 9             |
| <b>S728-1157</b> | <b>RBD<br/>Unclassified</b> | <b>IGHV3-66*02</b> | <b>IGLV3-9*01</b>  | <b>20</b> | <b>9</b> | <b>10</b>     | <b>9</b>      |
| S728-1261        | RBD<br>Unclassified         | IGHV4-4*02         | IGKV3-20*01        | 8         | 12       | 13            | 10            |
| S728-1690        | RBD<br>Class 2              | IGHV1-69*04        | IGKV3-20*01        | 19        | 8        | 15            | 9             |

**Table S3: Antigen information and resource.** Proline substitutions are indicated as *italic*. Related to Figure 1 and Figure S2.

| Antigen            | S1 NTD                                                                                                                   | RBD                                                                                                                                               | S1 CTD                                        | S2                                                                                                     | Source      |
|--------------------|--------------------------------------------------------------------------------------------------------------------------|---------------------------------------------------------------------------------------------------------------------------------------------------|-----------------------------------------------|--------------------------------------------------------------------------------------------------------|-------------|
| Spike FL, trimer   |                                                                                                                          |                                                                                                                                                   |                                               |                                                                                                        |             |
| Wildtype(WT)-2P    | -                                                                                                                        | -                                                                                                                                                 | -                                             | <i>K986P</i> ,<br><i>V987P</i>                                                                         | Krammer lab |
| Wildtype(WT)-6P    | -                                                                                                                        | -                                                                                                                                                 | -                                             | <i>F817P</i> ,<br><i>A829P</i> ,<br><i>A899P</i> ,<br><i>A942P</i> ,<br><i>K986P</i> ,<br><i>V987P</i> | Krammer lab |
| B.1.1.7 Alpha-2P   | del69-70,<br>del144                                                                                                      | N501Y                                                                                                                                             | A570D,<br>D614G,<br>P681H                     | T716I,<br>S982A,<br><i>K986P</i> ,<br><i>V987P</i> ,<br>D1118H                                         | Sather lab  |
| B.1.351 Beta-2P    | L18F,<br>D80A, D215G,<br>del241-243,<br>R246I                                                                            | K417N,<br>E484K,<br>N501Y                                                                                                                         | D614G                                         | A701V,<br><i>K986P</i> ,<br><i>V987P</i>                                                               | Sather lab  |
| P.1 Gamma-2P       | L18F,<br>T20N,<br>P26S, D138Y,<br>R190S                                                                                  | K417T,<br>E484K,<br>N501Y                                                                                                                         | D614G,<br>H655Y                               | <i>K986P</i> ,<br><i>V987P</i> ,<br>T1027I,<br>V1176F                                                  | Sather lab  |
| B.1.617.2 Delta-2P | T19R, G142D,<br>del156-157,<br>R158G                                                                                     | L452R,<br>T478K,                                                                                                                                  | D614G,<br>P681R                               | D950N,<br><i>K986P</i> ,<br><i>V987P</i>                                                               | Sather lab  |
| BA.1 Omicron-2P    | A67V,<br>H69del,<br>V70del,<br>T95I,<br>G142D,<br>V143del,<br>Y144del,<br>Y145del,<br>N211del,<br>L212I,<br>insert214EPE | G339D,<br>S371L,<br>S373P,<br>S375F,<br>K417N,<br>N440K,<br>G446S,<br>S477N,<br>T478K,<br>E484A,<br>Q493R,<br>G496S,<br>Q498R,<br>N501Y,<br>Y505H | T547K,<br>D614G,<br>H655Y,<br>N679K,<br>P681H | N764K,<br>D796Y,<br>N856K,<br>Q954H,<br>N969K,<br>L981F,<br><i>K986P</i> ,<br><i>V987P</i>             | Sather lab  |
| BA.1 Omicron-6P    | A67V,<br>H69del,<br>V70del,<br>T95I,<br>G142D,<br>V143del,<br>Y144del,                                                   | G339D,<br>S371L,<br>S373P,<br>S375F,<br>K417N,<br>N440K,<br>G446S,                                                                                | T547K,<br>D614G,<br>H655Y,<br>N679K,<br>P681H | <i>V705C</i> ,<br>N764K,<br>D796Y,<br><i>F817P</i> ,<br><i>A829P</i> ,<br>N856K,<br><i>T883C</i> ,     | Ward lab    |

|                 |                                                                                           |                                                                                                                                                                        |                                      |                                                                                                                    |             |
|-----------------|-------------------------------------------------------------------------------------------|------------------------------------------------------------------------------------------------------------------------------------------------------------------------|--------------------------------------|--------------------------------------------------------------------------------------------------------------------|-------------|
|                 | Y145del,<br>N211del,<br>insert214EPE                                                      | S477N,<br>T478K,<br>E484A,<br>Q493R,<br>G496S,<br>Q498R,<br>N501Y,<br>Y505H                                                                                            |                                      | <i>A899P,</i><br><i>A942P,</i><br><i>Q954H,</i><br><i>N969K,</i><br><i>L981F,</i><br><i>K986P,</i><br><i>V987P</i> |             |
| BA.2 Omicron-2P | T19I,<br>L24del,<br>P25del,<br>P26del,<br>A27S,<br>G142D,<br>V213G,                       | G339D,<br>S371F,<br>S373P,<br>S375F,<br>T376A,<br>D405N,<br>R408S,<br>K417N,<br>N440K,<br>S477N,<br>T478K,<br>E484A,<br>Q493R,<br>Q498R,<br>N501Y,<br>Y505H            | D614G,<br>H655Y,<br>N679K,<br>P681H, | N764K,<br>D796Y,<br>Q954H,<br>N969K,<br><i>K986P,</i><br><i>V987P</i>                                              | Sather lab  |
| BA.4 Omicron-2P | T19I,<br>L24del,<br>P25del,<br>P26del,<br>A27S,<br>H69del,<br>V70del,<br>G142D,<br>V213G, | G339D,<br>S371F,<br>S373P,<br>S375F,<br>T376A,<br>D405N,<br>R408S,<br>K417N,<br>N440K,<br>L452R,<br>S477N,<br>T478K,<br>E484A,<br>F486V,<br>Q498R,<br>N501Y,<br>Y505H, | D614G,<br>H655Y,<br>N679K,<br>P681H, | N764K,<br>D796Y,<br>Q954H,<br>N969K,<br><i>K986P,</i><br><i>V987P</i>                                              | Sather lab  |
| RBD             |                                                                                           |                                                                                                                                                                        |                                      |                                                                                                                    |             |
| WT              | -                                                                                         | -                                                                                                                                                                      | -                                    | -                                                                                                                  | In-house    |
| R346S           | -                                                                                         | R346S                                                                                                                                                                  | -                                    | -                                                                                                                  | In-house    |
| K417N           | -                                                                                         | K417N                                                                                                                                                                  | -                                    | -                                                                                                                  | In-house    |
| K417V           | -                                                                                         | K417V                                                                                                                                                                  | -                                    | -                                                                                                                  | Krammer lab |
| K417T           | -                                                                                         | K417T                                                                                                                                                                  | -                                    | -                                                                                                                  | In-house    |
| G446V           | -                                                                                         | G446V                                                                                                                                                                  | -                                    | -                                                                                                                  | In-house    |
| N439K           | -                                                                                         | N439K                                                                                                                                                                  | -                                    | -                                                                                                                  | Krammer lab |
| L452R           | -                                                                                         | L452R                                                                                                                                                                  | -                                    | -                                                                                                                  | In house    |
| S477N           | -                                                                                         | S477N                                                                                                                                                                  | -                                    | -                                                                                                                  | In-house    |
| E484K           | -                                                                                         | E484K                                                                                                                                                                  | -                                    | -                                                                                                                  | Krammer lab |
| F486A           | -                                                                                         | F486A                                                                                                                                                                  | -                                    | -                                                                                                                  | In-house    |



|                             |   |                                     |   |   |          |
|-----------------------------|---|-------------------------------------|---|---|----------|
| F486Y                       | - | F486Y                               | - | - | In-house |
| N487Q                       | - | N487Q                               | - | - | In-house |
| Y489F                       | - | Y489F                               | - | - | In-house |
| Q493A                       | - | Q493A                               | - | - | In-house |
| Q493N                       | - | Q493N                               | - | - | In-house |
| N501Y                       | - | N501Y                               | - | - | In-house |
| Y505A                       | - | Y505A                               | - | - | In-house |
| Y505F                       | - | Y505F                               | - | - | In-house |
| K417N/E484K/<br>L452R/N501Y | - | K417N/<br>E484K/<br>L452R/<br>N501Y | - | - | In-house |
| SARS-CoV-1 RBD WT           |   |                                     |   |   | In-house |
| MERS-CoV RBD WT             |   |                                     |   |   | In-house |

**Table S4: SARS-CoV-2 virus information and resource. Related to Figure 1 and 3.**

| Virus              | S1 NTD                                                                 | RBD                                                                | S1 CTD                    | S2                                                      | Source                                       |
|--------------------|------------------------------------------------------------------------|--------------------------------------------------------------------|---------------------------|---------------------------------------------------------|----------------------------------------------|
| D614G              | -                                                                      | -                                                                  | D614G                     | -                                                       | 2019-nCoV/USA-WA1/2020 D614G                 |
| B.1.351<br>Beta    | L18F,<br>D80A,<br>D215G,<br>L241del,<br>L242del,<br>A243del            | K417N,<br>E484K,<br>N501Y                                          | D614G                     | A701V                                                   | hCoV-19/USA/MD-HP01542/2021                  |
| P.1<br>Gamma       | L18F,<br>T20N,<br>P26S,<br>D138Y,<br>G181V,<br>R190S                   | K417T,<br>E484K,<br>N501Y                                          | D614G,<br>H655Y           | T1027I,<br>V1176F                                       | hCoV-19/Japan/TY7-501/2021 from BEI          |
| B.1.621<br>Mu      | in3T,<br>T95I,<br>Y144S,<br>Y145N,                                     | R346K,<br>E484K,<br>N501Y                                          | D614G,<br>P681H           | D950N                                                   | hCoV-19/USA/WI-UW-4340/2021                  |
| B.1.617.1<br>Kappa | G142D,<br>E154K                                                        | L452R,<br>E484Q                                                    | D614G,<br>P681R           | Q1071H,<br>H1101D                                       | hCoV-19/USA/CA-Stanford-15_S02/2021 from BEI |
| B.1.617.2<br>Delta | T19R,<br>T95I,<br>G142D,<br>E156G,<br>F157del,<br>R158del              | L452R,<br>T478K                                                    | D614G,<br>P681R           | D950N                                                   | hCoV-19/USA/WI-UW-5250/2021                  |
| BA.1<br>Omicron    | A67V,<br>H69del,<br>V70del,<br>T95I,<br>G142D,<br>V143del,<br>Y144del, | G339D,<br>S371L,<br>S373P,<br>S375F,<br>K417N,<br>N440K,<br>G446S, | T547K,<br>D614G,<br>P681H | N764K,<br>D796Y,<br>N856K,<br>Q954H,<br>N969K,<br>L981F | hCoV-19/USA/WI-WSLH-221686/2021              |

|                    |                                                                                                                      |                                                                                                                                                                       |                                      |                                     |                                               |
|--------------------|----------------------------------------------------------------------------------------------------------------------|-----------------------------------------------------------------------------------------------------------------------------------------------------------------------|--------------------------------------|-------------------------------------|-----------------------------------------------|
|                    | Y145del,<br>N211del,<br>L212I,<br>ins214EPE                                                                          | S477N,<br>T478K,<br>E484A,<br>Q493R,<br>G496S,<br>Q498R,<br>N501Y,<br>Y505H                                                                                           |                                      |                                     |                                               |
| BA.2<br>Omicron    | T19I,<br>delL24,<br>delP25,<br>delP26,<br>A27S,<br>G142D,<br>V213G                                                   | G339D,<br>S371F,<br>S373P,<br>S375F,<br>T376A,<br>D405N,<br>R408S,<br>K417N,<br>N440K,<br>S477N,<br>T478K,<br>E484A,<br>Q493R,<br>Q498R,<br>N501Y,<br>Y505H           | D614G,<br>H655Y,<br>N679K,<br>P681H  | N764K,<br>D796Y,<br>Q954H,<br>N969K | hCoV-19/Japan/UT-<br>NCD1288-2N/2022          |
| BA.2.75<br>Omicron | T19I,<br>delL24,<br>delP25,<br>delP26,<br>A27S,<br>G142D,<br>K147E,<br>W152R,<br>F157L,<br>I210V,<br>V213G,<br>G257S | G339H,<br>S371F,<br>S373P,<br>S375F,<br>T376A,<br>D405N,<br>R408S,<br>K417N,<br>N440K,<br>G446S,<br>N460K,<br>S477N,<br>T478K,<br>E484A,<br>Q498R,<br>N501Y,<br>Y505H | D614G,<br>H655Y,<br>N679K,<br>P681H  | N764K,<br>D796Y,<br>Q954H,<br>N969K | hCoV-19/Japan/TY41-<br>716/2022               |
| BA.4<br>Omicron    | T19I,<br>delL24,<br>delP25,<br>delP26,<br>A27S,<br>delH69,<br>delV70,<br>G142D,<br>V213G                             | G339D,<br>S371F,<br>S373P,<br>S375F,<br>T376A,<br>D405N,<br>R408S,<br>K417N,<br>N440K,<br>L452R,<br>S477N,<br>T478K,                                                  | D614G,<br>H655Y,<br>N679K,<br>P681H, | N764K,<br>D796Y,<br>Q954H,<br>N969K | hCoV-19/USA/MD-<br>HP30386-<br>PIDNBVCCQ/2022 |

|                 |                                                                                                                      |                                                                                                                                                                                 |                                               |                                     |                                                 |
|-----------------|----------------------------------------------------------------------------------------------------------------------|---------------------------------------------------------------------------------------------------------------------------------------------------------------------------------|-----------------------------------------------|-------------------------------------|-------------------------------------------------|
|                 |                                                                                                                      | F486V,<br>E484A,<br>Q498R,<br>N501Y,<br>Y505H,                                                                                                                                  |                                               |                                     |                                                 |
| BA.5<br>Omicron | T19I,<br>delL24,<br>delP25,<br>delP26,<br>A27S,<br>delH69,<br>delV70,<br>G142D,<br>V213G                             | G339D,<br>S371F,<br>S373P,<br>S375F,<br>T376A,<br>D405N,<br>R408S,<br>K417N,<br>N440K,<br>L452R,<br>S477N,<br>T478K,<br>F486V,<br>E484A,<br>Q498R,<br>N501Y,<br>Y505H,          | D614G,<br>H655Y,<br>N679K,<br>P681H,          | N764K,<br>D796Y,<br>Q954H,<br>N969K | SARS-CoV-<br>2/human/USA/COR-22-<br>063113/2022 |
| BL.1<br>Omicron | T19I,<br>delL24,<br>delP25,<br>delP26,<br>A27S,<br>G142D,<br>K147E,<br>W152R,<br>F157L,<br>I210V,<br>V213G,<br>G257S | G339H,<br>R346T,<br>S371F,<br>S373P,<br>S375F,<br>T376A,<br>D405N,<br>R408S,<br>K417N,<br>N440K,<br>G446S,<br>N460K,<br>S477N,<br>T478K,<br>E484A,<br>Q498R,<br>N501Y,<br>Y505H | D574V,<br>D614G,<br>H655Y,<br>N679K,<br>P681H | N764K,<br>D796Y,<br>Q954H,<br>N969K | SARS-CoV-2/human<br>/USA/WI-UW-12980/2022       |

**Table S5: Pairs of S728-1157 and spike-WT-6P-Mut7 residues within predicted hydrogen bonding distances.** Calculated using EpitopeAnalyzer<sup>63</sup> using a cutoff distance of 3.4 Å. **Related to Figure 2 and Figure S4.**

| # | RBD<br>Residue<br>[Atom] | Ab<br>Residue<br>[atom] | Antibody<br>Region | Distance<br>(Å) | RBD residue<br>mutated in<br>Omicron VOC | RBD residue<br>conserved across<br>all VOC's |
|---|--------------------------|-------------------------|--------------------|-----------------|------------------------------------------|----------------------------------------------|
|---|--------------------------|-------------------------|--------------------|-----------------|------------------------------------------|----------------------------------------------|

|    |            |           |       |      |     |     |
|----|------------|-----------|-------|------|-----|-----|
| 1  | T415 [OG]  | S56 [OG1] | CDRH2 | 2.78 | No  | Yes |
| 2  | Y421 [OH]  | S53 [O]   | CDRH2 | 2.73 | No  | Yes |
| 3  | Y453 [OH]  | D98 [OD1] | CDRH3 | 3.5  | No  | Yes |
| 4  | L455 [O]   | Y33 [OH]  | CDRH1 | 3.29 | No  | Yes |
| 5  | R457 [O]   | S53 [OG]  | CDRH2 | 3.25 | No  | Yes |
| 6  | Y473 [OH]  | R31 [O]   | CDRH1 | 2.76 | No  | Yes |
| 7  | Y473 [OH]  | S53 [OG]  | CDRH2 | 3.26 | No  | Yes |
| 8  | Q474 [O]   | R31 [NH1] | CDRH1 | 3.08 | No  | Yes |
| 9  | A475 [O]   | L28 [N]   | CDRH1 | 3.05 | No  | Yes |
| 10 | A475 [O]   | N32 [ND2] | CDRH1 | 2.98 | No  | Yes |
| 11 | E484 [OE2] | Y99 [OH]  | CDRH3 | 2.61 | Yes | No  |
| 12 | N487 [ND2] | G26 [O]   | FR1   | 3.01 | No  | Yes |
| 13 | C488 [O]   | Y99 [OH]  | CDRH3 | 3.25 | No  | Yes |
| 14 | Y489 [OH]  | R94 [NH1] | FR3   | 2.64 | No  | Yes |
| 15 | Y505 [OH]  | Q31 [NE2] | CDRL1 | 2.62 | Yes | No  |

**Table S6. Cryo-EM data collection, refinement and model building statistics. Related to Figure 2 and Figure S4.**

| Map                                            | S728-1157 + SARS-CoV-2-6P-Mut7 (global refinement) | S728-1157 + SARS-CoV-2-6P-Mut7 (focused refinement) |
|------------------------------------------------|----------------------------------------------------|-----------------------------------------------------|
| EMDB                                           | EMD-27112                                          | EMD-27113                                           |
| <b>Data collection</b>                         |                                                    |                                                     |
| Microscope                                     | Thermo Fisher Titan Krios                          |                                                     |
| Voltage (kV)                                   | 300                                                |                                                     |
| Detector                                       | Gatan K2 Summit                                    |                                                     |
| Recording mode                                 | Counting                                           |                                                     |
| Nominal magnification                          | 130kx                                              |                                                     |
| Movie micrograph pixelsize (Å)                 | 1.045                                              |                                                     |
| Dose rate (e <sup>-</sup> /[(camera pixel)*s]) | 6.017                                              |                                                     |
| Number of frames per movie micrograph          | 36                                                 |                                                     |
| Frame exposure time (ms)                       | 250                                                |                                                     |
| Movie micrograph exposure time (s)             | 9                                                  |                                                     |
| Total dose (e <sup>-</sup> /Å <sup>2</sup> )   | 50.0                                               |                                                     |
| Defocus range (μm)                             | -0.8 to -1.5                                       |                                                     |
| <b>EM data processing</b>                      |                                                    |                                                     |
| Number of movie micrographs                    | 1,718                                              | 1,718                                               |
| Number of molecular projection images in map   | 151,948                                            | 29,595                                              |
| Symmetry                                       | C1                                                 | C1                                                  |
| Map resolution (FSC 0.143; Å)                  | 3.3                                                | 3.7                                                 |

|                                            |            |        |
|--------------------------------------------|------------|--------|
| Map sharpening B-factor ( $\text{\AA}^2$ ) | -85.3      | -71.1  |
| <b>Structure Building and Validation</b>   |            |        |
| <i>Number of atoms in deposited model</i>  |            |        |
| SARS-CoV-2-6P-Mut7                         | <i>n/a</i> | 20,759 |
| Fab Fv                                     | <i>n/a</i> | 1,653  |
| Glycans                                    | <i>n/a</i> | 182    |
| MolProbity score                           | <i>n/a</i> | 1.07   |
| Clashscore                                 | <i>n/a</i> | 1.66   |
| Map correlation coefficient                | <i>n/a</i> | 0.75   |
| EMRinger score                             | <i>n/a</i> | 2.57   |
| d FSC model (0.5; $\text{\AA}$ )           | <i>n/a</i> | 3.8    |
| <i>RMSD from ideal</i>                     |            |        |
| Bond length ( $\text{\AA}$ )               | <i>n/a</i> | 0.021  |
| Bond angles ( $^\circ$ )                   | <i>n/a</i> | 1.81   |
| <i>Ramachandran plot</i>                   |            |        |
| Favored (%)                                | <i>n/a</i> | 97.13  |
| Allowed (%)                                | <i>n/a</i> | 2.87   |
| Outliers (%)                               | <i>n/a</i> | 0.00   |
| Side chain rotamer outliers (%)            | <i>n/a</i> | 0.08   |
| C $\beta$ outliers (%)                     | <i>n/a</i> | 0.00   |
| PDB                                        | <i>n/a</i> | 8d0z   |

## **Materials and Methods**

### **Monoclonal antibody isolation**

We isolated a panel of RBD-reactive mAbs from peripheral blood mononuclear cells (PBMCs) of convalescent donors who previously had experienced symptomatic infection with SARS-CoV-2 (Table S1). The samples were collected during the first wave of the pandemic in May 2020, before other SARS-CoV-2 variants emerged. All studies were performed with the approval of the University of Chicago institutional review board (IRB20-0523). All participants provided prior written informed consent for the use of blood in research applications. This clinical trial was registered at ClinicalTrials.gov under identifier NCT04340050.

PBMCs were isolated from leukoreduction filters and frozen as described previously<sup>21</sup>. B cells were enriched from PBMCs via fluorescence-activated cell sorting (FACS). Cells were stained with CD19, CD3, and antigen probes conjugated oligo-fluorophore; cells of interest were identified as CD3<sup>-</sup>CD19<sup>+</sup>Antigen<sup>+</sup>. All mAbs were generated from oligo-tagged antigen bait-sorted cells identified through single-cell RNA sequencing (RNA-seq), as described previously<sup>12,21</sup>.

Antigen-specific B cells were selected to generate mAbs based on antigen-probe intensity analyzed by JMP Pro 15. Antibody heavy and light chain genes were synthesized and cloned into human IgG1 and human kappa or lambda light chain expression vectors by Gibson assembly as previously described<sup>56</sup>. The heavy and light chains of the corresponding mAb were transiently co-transfected into HEK293T cells. After transfection for 18 h, the transfected cells were supplemented with Protein-Free Hybridoma Medium Supernatant (PFHM-II, Gibco). The supernatant containing secreted mAb was harvested at day 4 and purified using protein A-agarose beads (Thermo Fisher) as detailed previously<sup>56</sup>.

### **Recombinant spike protein expression**

The recombinant D614G SARS-CoV-2 full-length (FL) spike, WT RBD, single RBD mutants (R346S, K417N, K417T, G446V, L452R, S477N, F486A, F486Y, N487Q, Y489F, Q493A, Q493N, N501Y, Y505A, Y505F), combination RBD mutant

(K417N/E484K/L452R/NN501Y), SARS-CoV-1 RBD and MERS-CoV RBD were generated in-house. Briefly, the recombinant antigens were expressed using Expi293F cells. The gene of interest was cloned into mammalian expression vector (in-house modified AbVec) and transfected using ExpiFectamine 293 kit according to the manufacturer's protocol. The supernatant was harvested at day 4 after transfection and incubated with Ni-nitrilotriacetic acid (Ni-NTA) agarose (Qiagen). The purification was carried out using gravity flow column and eluted with imidazole-containing buffer as previously described<sup>57,58</sup>. The eluate was buffering-exchanged with PBS using Amicon centrifugal unit (Millipore). The recombinant FL spikes derived from variants B.1.1.7 Alpha, B.1.351 Beta, P.1 Gamma, B.1.617.2 Delta, BA.1, BA.2 and BA.4 Omicron were produced in the Sather Laboratory at Seattle Children's Research Institute. The K417V, N439K, E484K RBDs and recombinant FL spike WT-2P and 6P were produced in Krammer laboratory at the Icahn School of Medicine at Mount Sinai. The SARS-CoV-2-6P-Mut7 and spike BA.1 Omicron-6P were designed and produced as described in a previous study<sup>59</sup>. The protein sequences and resources for each antigen are listed in [Table S3](#).

### **Enzyme-linked immunosorbent assay (ELISA)**

Recombinant SARS-CoV-2 spike/RBD proteins were coated onto high protein-binding microtiter plates (Costar) at 2 µg/ml in phosphate buffered saline (PBS) at 50 µl/well, and kept overnight at 4°C. Plates were washed with PBS containing 0.05% Tween 20 (PBS-T) and blocked with 150 µl of PBS containing 20% fetal bovine serum (FBS) for 1 h at 37°C. Monoclonal antibodies were serially diluted 3-fold starting from 10 µg/ml in PBS and incubated in the wells for 1 h at 37°C. Plates were then washed and incubated with horseradish peroxidase (HRP)-conjugated goat anti-human IgG antibody (Jackson ImmunoResearch, 1:1000) for 1 h at 37°C. After washing, 100 µl of Super AquaBlue ELISA substrate (eBioscience) was added per well. Absorbance was measured at 405nm on a microplate spectrophotometer (Bio-Rad). The assays were standardized using control antibodies with known binding characteristics in every plate, and the plates were

developed until the absorbance of the control reached an optical density (OD) of 3.0. All mAbs were tested in duplicate, and each experiment was performed twice.

### **Serum ELISA**

High protein-binding microtiter plates were coated with recombinant SARS-CoV-2 spike antigens at 2 µg/ml in PBS overnight at 4°C. Plates were washed with PBS 0.05% Tween and blocked with 200 µl PBS 0.1% Tween + 3% skim milk powder for 1 hour at room temperature (RT). Plasma samples were heat-inactivated for 1 hour at 56°C before perform serology experiment. Plasma were serially diluted 2-fold in PBS 0.1% Tween + 1% skim milk powder. Plates were incubated with serum dilutions for 2 hours at RT. The HRP-conjugated goat anti-human Ig secondary antibody diluted at 1:3000 with PBS 0.1% Tween + 1% skim milk powder was used to detect binding of antibodies. After 1-hour of incubation, plates were developed with 100 µl SigmaFast OPD solution (Sigma-Aldrich) for 10 minutes. Then, 50 µl 3M HCl was used to stop the development reaction. Absorbance was measured at 490 nm on a microplate spectrophotometer (BioRad). End point titers were extrapolated from sigmoidal 4PL (where X is log concentration) standard curve for each sample. Limit of detection (LOD) is defined as the mean plus 3 S.D. of the O.D. signal recorded using plasma from pre-SARS-CoV-2 subjects. All calculations were performed in GraphPad Prism software (version 9.0).

### **Competition ELISA**

To determine the target epitope classification of RBD-reactive mAbs, competition ELISAs were performed using other mAbs with known epitope binding characteristics as competitor mAbs. Competitor mAbs were biotinylated using EZ-Link sulfo-NHS-biotin (Thermo Scientific) for 2h at room temperature (RT). The excess biotin of biotinylated mAbs was removed with 7k molecular weight-cutoff (MWCO) Zeba spin desalting columns (Thermo Scientific). Plates were coated with 2 µg/ml RBD antigen overnight at 4°C. Plates were blocked with PBS–20% FBS for 2h at RT, and the 2-fold dilution of the mAbs of an undetermined class, or serum, was added, starting at 20 µg/ml of mAbs and a 1:10 dilution of serum. After antibody incubation for 2h at RT, the biotinylated competitor



mAb was added at a concentration twice that of its dissociation constant ( $K_D$ ) and incubated for another 2 h at RT together with the mAb or serum that was previously added. Plates were washed and incubated with 100  $\mu$ l HRP-conjugated streptavidin (Southern Biotech) at a dilution of 1:1000 for 1 h at 37°C. The plates were developed with the Super AquaBlue ELISA substrate (eBioscience). To normalize the assays, the competitor biotinylated mAb was added in a well without any competing mAbs or serum as a control. Data were recorded when the absorbance of the control well reached and OD of 1.0-1.5. The percent competition between mAbs was then calculated by dividing a sample's observed OD by the OD reached by the positive control, subtracting this value from 1, and multiplying by 100. For serum, ODs were  $\log_{10}$ -transformed and analyzed by nonlinear regression to determine the 50% inhibition concentration ( $IC_{50}$ ) values using GraphPad Prism software (version 9.0). The data were transformed to  $\text{Log}_{10}P$  and plotted into graph representative of reciprocal serum dilution of the  $IC_{50}$  of serum dilution that can achieve 50% competition with the competitor mAb of interest. All mAbs were tested in duplicate, each experiment was performed two times independently, and values from two independent experiments were averaged.

### **Plaque assays**

Plaque assays were performed with SARS-CoV-2 variant viruses on Vero E6/TMPRSS2 cells (Table S4). Cells were cultured to achieve 90% confluency prior to being trypsinized and seeded at a density of  $3 \times 10^4$  cells/well in 96-well plates. On the following day,  $10^2$  plaque-forming unit (PFU) of SARS-CoV-2 variant was incubated with 2-fold-diluted mAbs for 1h. The antibody-virus mixture was incubated with Vero E6/TMPRSS2 cells for 3 days at 37°C. Plates were fixed with 20% methanol and then stained with crystal violet solution. The complete inhibitory concentrations ( $IC_{99}$ ) were calculated using the  $\log(\text{inhibitor})$  versus normalized response (variable slope), performed in GraphPad Prism (version 9.0). All mAbs were tested in duplicate, and each experiment was performed twice.

### **Focus reduction neutralization test (FRNT)**

Focus reduction neutralization test (FRNT) were used to determine neutralization activities as an additional platform beside plaque assay. Serial dilutions of serum starting at a final concentration of 1:20 will be mixed with  $10^3$  focus-forming units of virus per well and incubated for 1 h at 37 °C. A pooled pre-pandemic serum sample is served as a control. The antibody-virus mixture will be inoculated onto Vero E6/TMPRSS2 cells in 96-well plates and incubated for 1 h at 37 °C. An equal volume of methylcellulose solution was added to each well. The cells were incubated for 16 h at 37 °C and then fixed with formalin. After the formalin was removed, the cells were immunostained with a mouse monoclonal antibody against SARS-CoV-1/2 nucleoprotein [clone 1C7C7 (Sigma-Aldrich)], followed by a HRP-labeled goat anti-mouse immunoglobulin (SeraCare Life Sciences). The infected cells were stained with TrueBlue Substrate (SeraCare Life Sciences) and then washed with distilled water. After cell drying, the focus numbers were quantified by using an ImmunoSpot S6 Analyzer, ImmunoCapture software, and BioSpot software (Cellular Technology). The  $IC_{50}$  was calculated from the interpolated value from the log(inhibitor) versus normalized response, using variable slope (four parameters) nonlinear regression performed in GraphPad Prism (version 9.0).

### **Negative stain electron microscopy**

Spike BA.1 Omicron-6P was complexed with a 0.5-fold molar excess of IgG S728-1157 and incubated for 30 mins at room temperature. The complex was diluted to 0.03 mg/ml and deposited on a glow-discharged carbon-coated copper mesh grid. 2% uranyl formate (w/v) was used to stain the sample for 90 seconds. The negative stain dataset was collected on a Thermo Fisher Tecnai T12 Spirit (120keV, 56,000x magnification, 2.06 apix) paired with a FEI Eagle 4k x 4k CCD camera. Legion<sup>60</sup> was used to automate the data collection and raw micrographs were store in the Appion database<sup>61</sup>. Dogpicker<sup>62</sup> picked particles and the dataset was processed in RELION 3.0<sup>62</sup>. UCSF Chimera<sup>63</sup> was used for map segmentation and figure making.

### **Cryo-electron microscopy and model building**

SARS-CoV-2-6P-Mut7 was complexed with a 0.5-fold molar excess of IgG S728-1157 and incubated for 30 mins at room temperature. Grids were prepared using a Thermo Fisher Vitrobot Mark IV set to 4°C and 100% humidity. The complex, at 0.7 mg/ml, was briefly incubated with lauryl maltose neopentyl glycol (final concentration of 0.005 mM; Anatrace), deposited on a glow-discharged Quantifoil 1.2/1.3-400 mesh grid, and blotted for 3 seconds. The grid was loaded into a Thermo Fisher Titan Krios (130,000x magnification, 300 kEV, 1.045-Å pixel size) paired with a Gatan 4k x 4k K2 Summit direct electron detector. The Leginon software was used for data collection automation and resulting images were stored in the Appion database. Initial data processing was performed with cryoSPARC v3.2<sup>64</sup>, which included CTF correction using GCTF<sup>65</sup>, template picking, and 2D and 3D classification and refinement methods leading to a ~3.3 Å C1 global reconstruction. The particles from this reconstruction were imported into Relion 3.1<sup>66</sup>, subjected to C3 symmetry expansion, followed by focused 3D classifications without alignments using a mask around the antibody Fab and S-protein RBD regions of a single protomer. Classes with well-resolved density in this region were selected and subjected to additional rounds of focused classification. Refinements were performed with limited angular searches and a mask around the trimeric S-protein and a single Fab. The final set of particles reconstructed to ~3.7 Å global resolution.

Model building was initiated by rigid body docking of the x-ray structure of the Fab and a published cryo-EM model of the SARS-CoV-2 spike open state (PDB ID: 6VYB) into the cryo-EM map using UCSF Chimera<sup>63</sup>. Manual building, mutagenesis and refinement were performed in Coot 0.9.6<sup>67</sup>, followed by relaxed refinement using Rosetta Relax<sup>68</sup>. Model manipulation and validation was also done using Phenix 1.20<sup>69</sup>. More complete data collection, processing and model building statistics are summarized in [Table S6](#). Figures were generated using UCSF ChimeraX<sup>70</sup>.

## **Crystallization and X-ray structure determination**

384 conditions of the JCSG Core Suite (Qiagen) were used for crystal screening of S728-1157 Fab crystals on the robotic CrystalMation system (Rigaku) at Scripps Research. Crystallization trials were set-up by the vapor diffusion method in sitting drops containing 0.1  $\mu$ l of protein complex and 0.1  $\mu$ l of reservoir solution. Crystals appeared on day 14, were harvested on day 21, pre-equilibrated in cryoprotectant containing 15% ethylene glycol, and then flash cooled and stored in liquid nitrogen until data collection. Diffraction quality crystals were obtained in solution containing 0.2 M di-Ammonium tartrate, 20% (w/v) polyethylene glycol (PEG) 3350. Diffraction data were collected at cryogenic temperature (100 K) on Scripps/Stanford beamline 12-1 at the Stanford Synchrotron Radiation Lightsource (SSRL). The X-ray data were processed with HKL2000<sup>71</sup>. The X-ray structures were solved by molecular replacement (MR) using PHASER<sup>72</sup> with MR models for the Fabs from PDB ID: 7KN4<sup>73</sup>. Iterative model building and refinement were carried out in COOT<sup>74</sup> and PHENIX<sup>75</sup>, respectively.

### **Animals and challenge viruses**

To determine whether mAbs in the panel could reduce viral load *in vivo*, Syrian hamsters (females, 6-8 weeks old) were intraperitoneally administered 5 mg/kg of candidate mAb 1 day after intranasal infection with 10<sup>3</sup> PFU of SARS-CoV-2 viruses (an early SARS-CoV-2 isolate, Delta or BA.1 Omicron). Control animals were treated with an Ebola-specific mAb (KZ52) of matched isotype. At day 4 post-infection, lung tissues and nasal turbinate were collected to evaluate viral titers by standard plaque assay on Vero E6/TMPRSS2 cells. The animal study was conducted in accordance with the recommendations for care and use of animals by the Institutional Animal Care and Use Committee at the University of Wisconsin under BSL-3 containment using approved protocols.

### **Biolayer interferometry (BLI)**

To determine precise binding affinity, the dissociation constant ( $K_D$ ) of each mAb was performed by biolayer interferometry (BLI) with an Octet K2 instrument (Forte Bio/Sartorius). The trimeric spike SARS-CoV-2 and its variants were biotinylated (EZ-

Link Sulfo-NHS-Biotin, ThermoFisher), desalted (Zeba Spike Desalting, ThermoFisher), and loaded at a concentration of 500 nM onto streptavidin (SA) biosensor (Forte Bio/Sartorius) for 300 s, followed by kinetic buffer (1x PBS containing 0.02% Tween-20 and 0.1% bovine serum albumin) for 60 s. The biosensor was then moved to associate with mAbs of interest (142 nM) for 300 s, followed by disassociation with the kinetic buffer for 300 s. On rate, off-rate, and  $K_D$  were evaluated with a global fit, the average of those values with high R-squared from two independent experiments were presented. Analysis was performed by Octet Data Analysis HT software (Forte Bio/Sartorius) with 1:1 fitting model for Fabs and 1:2 interacting model for IgG.

For competitive assay by BLI, streptavidin (SA) biosensor was pre-equilibrated in 1xPBS for at least 600s to bind with the biotinylated trimeric spike WT-6P and spike BA.1 Omicron-6P for 300s. The first mAb was associated on the loaded sensor for 300s, followed by the second mAb for another 300s. The final volume for all the solutions was 200  $\mu$ l/well. All of the assays were performed with kinetic buffer at 30°C. Data were analyzed by Octet Data Analysis HT software (Forte Bio/Sartorius) and plotted using GraphPad Prism.

## Statistics

All statistical analyses were performed using GraphPad Prism software (version 9.0). The numbers of biological repeats for experiments and specific tests for statistical significance used are described in the corresponding figure legends. P values of  $\leq 0.05$  were considered significant [\* ,  $P \leq 0.05$ ; \*\* ,  $P \leq 0.01$ ; \*\*\* ,  $P \leq 0.001$ ; \*\*\*\* ,  $P < 0.0001$ ), while P values of  $> 0.05$  were considered as non-significant (ns)].

## References

- 1 Hou, Y. J. *et al.* SARS-CoV-2 D614G variant exhibits efficient replication ex vivo and transmission in vivo. *Science* **370**, 1464-1468, doi:10.1126/science.abe8499 (2020).
- 2 Garcia-Beltran, W. F. *et al.* Multiple SARS-CoV-2 variants escape neutralization by vaccine-induced humoral immunity. *Cell* **184**, 2523, doi:10.1016/j.cell.2021.04.006 (2021).
- 3 Wall, E. C. *et al.* Neutralising antibody activity against SARS-CoV-2 VOCs B.1.617.2 and B.1.351 by BNT162b2 vaccination. *Lancet* **397**, 2331-2333, doi:10.1016/S0140-6736(21)01290-3 (2021).

- 4 Edara, V. V. *et al.* Infection and vaccine-induced neutralizing-antibody responses to the SARS-CoV-2 B.1.617 variants. *N Engl J Med* **385**, 664-666, doi:10.1056/NEJMc2107799 (2021).
- 5 Zhou, D. *et al.* Evidence of escape of SARS-CoV-2 variant B.1.351 from natural and vaccine-induced sera. *Cell* **184**, 2348-2361 e2346, doi:10.1016/j.cell.2021.02.037 (2021).
- 6 Weisblum, Y. *et al.* Escape from neutralizing antibodies by SARS-CoV-2 spike protein variants. *eLife* **9**, e61312, doi:10.7554/eLife.61312 (2020).
- 7 Graham, F. Daily briefing: Omicron coronavirus variant puts scientists on alert. *Nature*, doi:10.1038/d41586-021-03564-6 (2021).
- 8 Karim, S. S. A. & Karim, Q. A. Omicron SARS-CoV-2 variant: a new chapter in the COVID-19 pandemic. *Lancet* **398**, 2126-2128, doi:10.1016/S0140-6736(21)02758-6 (2021).
- 9 Carreño, J. M. *et al.* Activity of convalescent and vaccine serum against SARS-CoV-2 Omicron. *Nature* **602**, 682-688, doi:10.1038/s41586-022-04399-5 (2021).
- 10 VanBlargan, L. A. *et al.* An infectious SARS-CoV-2 B.1.1.529 Omicron virus escapes neutralization by therapeutic monoclonal antibodies. *Nat Med* **28**, 490-495, doi:10.1038/s41591-021-01678-y (2022).
- 11 Takashita, E. *et al.* Efficacy of antibodies and antiviral drugs against COVID-19 Omicron variant. *N Engl J Med* **386**, 995-998, doi:10.1056/NEJMc2119407 (2022).
- 12 Changrob, S. *et al.* Cross-neutralization of emerging SARS-CoV-2 variants of concern by antibodies targeting distinct epitopes on spike. *mBio* **12**, e0297521, doi:10.1128/mBio.02975-21 (2021).
- 13 Guthmiller, J. J. *et al.* SARS-CoV-2 infection severity is linked to superior humoral immunity against the spike. *mBio* **12**, e02940-02920, doi:10.1128/mBio.02940-20 (2021).
- 14 Greaney, A. J. *et al.* Mapping mutations to the SARS-CoV-2 RBD that escape binding by different classes of antibodies. *Nat Commun* **12**, 4196, doi:10.1038/s41467-021-24435-8 (2021).
- 15 Liu, H. & Wilson, I. A. Protective neutralizing epitopes in SARS-CoV-2. *Immunol Rev*, doi:10.1111/imr.13084 (2022).
- 16 Jette, C. A. *et al.* Broad cross-reactivity across sarbecoviruses exhibited by a subset of COVID-19 donor-derived neutralizing antibodies. *Cell Rep* **36**, 109760, doi:10.1016/j.celrep.2021.109760 (2021).
- 17 Brouwer, P. J. M. *et al.* Potent neutralizing antibodies from COVID-19 patients define multiple targets of vulnerability. *Science* **369**, 643-650, doi:10.1126/science.abc5902 (2020).
- 18 Pinto, D. *et al.* Cross-neutralization of SARS-CoV-2 by a human monoclonal SARS-CoV antibody. *Nature* **583**, 290-295, doi:10.1038/s41586-020-2349-y (2020).
- 19 Robbiani, D. F. *et al.* Convergent antibody responses to SARS-CoV-2 in convalescent individuals. *Nature* **584**, 437-442, doi:10.1038/s41586-020-2456-9 (2020).
- 20 Yuan, M. *et al.* Structural basis of a shared antibody response to SARS-CoV-2. *Science* **369**, 1119-1123, doi:10.1126/science.abd2321 (2020).
- 21 Dugan, H. L. *et al.* Profiling B cell immunodominance after SARS-CoV-2 infection reveals antibody evolution to non-neutralizing viral targets. *Immunity* **54**, 1290-1303, doi:10.1016/j.immuni.2021.05.001. (2021).
- 22 Rogers, T. F. *et al.* Isolation of potent SARS-CoV-2 neutralizing antibodies and protection from disease in a small animal model. *Science* **369**, 956-963, doi:10.1126/science.abc7520 (2020).
- 23 Schmitz, A. J. *et al.* A vaccine-induced public antibody protects against SARS-CoV-2 and emerging variants. *Immunity* **54**, 2159-2166.e6, doi:10.1016/j.immuni.2021.08.013 (2021).
- 24 Shi, R. *et al.* A human neutralizing antibody targets the receptor-binding site of SARS-CoV-2. *Nature* **584**, 120-124, doi:10.1038/s41586-020-2381-y (2020).
- 25 Yuan, M., Liu, H., Wu, N. C. & Wilson, I. A. Recognition of the SARS-CoV-2 receptor binding domain by neutralizing antibodies. *Biochem Biophys Res Commun* **538**, 192-203, doi:10.1016/j.bbrc.2020.10.012 (2021).

- 26 Cao, Y. *et al.* Potent neutralizing antibodies against SARS-CoV-2 identified by high-throughput single-cell sequencing of convalescent patients' B cells. *Cell* **182**, 73-84.e16, doi:10.1016/j.cell.2020.05.025 (2020).
- 27 Barnes, C. O. *et al.* Structures of human antibodies bound to SARS-CoV-2 spike reveal common epitopes and recurrent features of antibodies. *Cell* **182**, 828-842.e6, doi:10.1016/j.cell.2020.06.025 (2020).
- 28 Corbett, K. S. *et al.* SARS-CoV-2 mRNA vaccine design enabled by prototype pathogen preparedness. *Nature* **586**, 567-571, doi:10.1038/s41586-020-2622-0 (2020).
- 29 Amanat, F. *et al.* Introduction of two prolines and removal of the polybasic cleavage site lead to higher efficacy of a recombinant spike-based SARS-CoV-2 vaccine in the mouse model. *mBio* **12**, doi:10.1128/mBio.02648-20 (2021).
- 30 Sun, W. *et al.* A Newcastle disease virus expressing a stabilized spike protein of SARS-CoV-2 induces protective immune responses. *Nat Commun* **12**, 6197, doi:10.1038/s41467-021-26499-y (2021).
- 31 Hsieh, C. L. *et al.* Structure-based design of prefusion-stabilized SARS-CoV-2 spikes. *Science* **369**, 1501-1505, doi:10.1126/science.abd0826 (2020).
- 32 Yuan, M. *et al.* A highly conserved cryptic epitope in the receptor binding domains of SARS-CoV-2 and SARS-CoV. *Science* **368**, 630-633, doi:10.1126/science.abb7269 (2020).
- 33 Rogers, T. F. *et al.* Isolation of potent SARS-CoV-2 neutralizing antibodies and protection from disease in a small animal model. *Science* **369**, 956-963, doi:10.1126/science.abc7520 (2020).
- 34 Starr, T. N., Greaney, A. J., Dingens, A. S. & Bloom, J. D. Complete map of SARS-CoV-2 RBD mutations that escape the monoclonal antibody LY-CoV555 and its cocktail with LY-CoV016. *Cell Rep Med* **2**, 100255, doi:10.1016/j.xcrm.2021.100255 (2021).
- 35 Baum, A. *et al.* REGN-COV2 antibodies prevent and treat SARS-CoV-2 infection in rhesus macaques and hamsters. *Science* **370**, 1110-1115, doi:10.1126/science.abe2402 (2020).
- 36 Yuan, M. *et al.* Structural basis of a shared antibody response to SARS-CoV-2. *Science* **369**, 1119-1123, doi:10.1126/science.abd2321 (2020).
- 37 Wu, N. C. *et al.* An alternative binding mode of IGHV3-53 antibodies to the SARS-CoV-2 receptor binding domain. *Cell Rep* **33**, 108274, doi:10.1016/j.celrep.2020.108274 (2020).
- 38 Wu, Y. *et al.* A noncompeting pair of human neutralizing antibodies block COVID-19 virus binding to its receptor ACE2. *Science* **368**, 1274-1278, doi:10.1126/science.abc2241 (2020).
- 39 Yuan, M. *et al.* Structural and functional ramifications of antigenic drift in recent SARS-CoV-2 variants. *Science* **373**, 818-823, doi:10.1126/science.abh1139 (2021).
- 40 Gobeil, S. M. *et al.* Structural diversity of the SARS-CoV-2 Omicron spike. *Mol Cell* **82**, 2050-2068.e6, doi:10.1016/j.molcel.2022.03.028 (2022).
- 41 Yan, Q. *et al.* Germline IGHV3-53-encoded RBD-targeting neutralizing antibodies are commonly present in the antibody repertoires of COVID-19 patients. *Emerg Microbes Infect* **10**, 1097-1111, doi:10.1080/22221751.2021.1925594 (2021).
- 42 Barnes, C. O. *et al.* SARS-CoV-2 neutralizing antibody structures inform therapeutic strategies. *Nature* **588**, 682-687, doi:10.1038/s41586-020-2852-1 (2020).
- 43 Zhang, Q. *et al.* Potent and protective IGHV3-53/3-66 public antibodies and their shared escape mutant on the spike of SARS-CoV-2. *Nat Commun* **12**, 4210, doi:10.1038/s41467-021-24514-w (2021).
- 44 Wang, Z. *et al.* mRNA vaccine-elicited antibodies to SARS-CoV-2 and circulating variants. *Nature* **592**, 616-622, doi:10.1038/s41586-021-03324-6 (2021).
- 45 Starr, T. N. *et al.* SARS-CoV-2 RBD antibodies that maximize breadth and resistance to escape. *Nature* **597**, 97-102, doi:10.1038/s41586-021-03807-6 (2021).
- 46 Walls, A. C. *et al.* Structure, function, and antigenicity of the SARS-CoV-2 spike glycoprotein. *Cell* **181**, 281-292.e6, doi:10.1016/j.cell.2020.02.058 (2020).
- 47 Henderson, R. *et al.* Controlling the SARS-CoV-2 spike glycoprotein conformation. *Nat Struct Mol Biol* **27**, 925-933, doi:10.1038/s41594-020-0479-4 (2020).

- 48 Shrestha, L. B., Tedla, N. & Bull, R. A. Broadly-neutralizing antibodies against emerging SARS-CoV-2 variants. *Front Immunol* **12**, 752003, doi:10.3389/fimmu.2021.752003 (2021).
- 49 Greaney, A. J. *et al.* Antibodies elicited by mRNA-1273 vaccination bind more broadly to the receptor binding domain than do those from SARS-CoV-2 infection. *Sci Transl Med* **13**, eabi9915, doi:10.1126/scitranslmed.abi9915 (2021).
- 50 Reincke, S. M. *et al.* SARS-CoV-2 Beta variant infection elicits potent lineage-specific and cross-reactive antibodies. *Science* **375**, 782-787, doi:10.1126/science.abm5835 (2022).
- 51 Wrammert, J. *et al.* Broadly cross-reactive antibodies dominate the human B cell response against 2009 pandemic H1N1 influenza virus infection. *J Exp Med* **208**, 181-193, doi:10.1084/jem.20101352 (2011).
- 52 Guthmiller, J. J. *et al.* First exposure to the pandemic H1N1 virus induced broadly neutralizing antibodies targeting hemagglutinin head epitopes. *Sci Transl Med* **13**, eabg4535, doi:10.1126/scitranslmed.abg4535 (2021).
- 53 Bajic, G. *et al.* Influenza antigen engineering focuses immune responses to a subdominant but broadly protective viral epitope. *Cell Host Microbe* **25**, 827-835.e6, doi:10.1016/j.chom.2019.04.003 (2019).
- 54 Nachbagauer, R. *et al.* A chimeric hemagglutinin-based universal influenza virus vaccine approach induces broad and long-lasting immunity in a randomized, placebo-controlled phase I trial. *Nat Med* **27**, 106-114, doi:10.1038/s41591-020-1118-7 (2021).
- 55 Angeletti, D. *et al.* Outflanking immunodominance to target subdominant broadly neutralizing epitopes. *Proc Natl Acad Sci U S A* **116**, 13474-13479, doi:10.1073/pnas.1816300116 (2019).
- 56 Guthmiller, J. J., Dugan, H. L., Neu, K. E., Lan, L. Y. & Wilson, P. C. An efficient method to generate monoclonal antibodies from human B cells. *Methods Mol Biol* **1904**, 109-145, doi:10.1007/978-1-4939-8958-4\_5 (2019).
- 57 Amanat, F. *et al.* A serological assay to detect SARS-CoV-2 seroconversion in humans. *Nat Med* **26**, 1033-1036, doi:10.1038/s41591-020-0913-5 (2020).
- 58 Stadlbauer, D. *et al.* SARS-CoV-2 seroconversion in humans: A detailed protocol for a serological assay, antigen production, and test setup. *Curr Protoc Microbiol* **57**, e100, doi:10.1002/cpmc.100 (2020).
- 59 Torres, J. L. *et al.* Structural insights of a highly potent pan-neutralizing SARS-CoV-2 human monoclonal antibody. *Proc Natl Acad Sci U S A* **119**, e2120976119, doi:10.1073/pnas.2120976119 (2022).
- 60 Suloway, C. *et al.* Automated molecular microscopy: the new Legimon system. *J Struct Biol* **151**, 41-60, doi:10.1016/j.jsb.2005.03.010 (2005).
- 61 Lander, G. C. *et al.* Appion: an integrated, database-driven pipeline to facilitate EM image processing. *J Struct Biol* **166**, 95-102, doi:10.1016/j.jsb.2009.01.002 (2009).
- 62 Voss, N. R., Yoshioka, C. K., Radermacher, M., Potter, C. S. & Carragher, B. DoG Picker and TiltPicker: software tools to facilitate particle selection in single particle electron microscopy. *J Struct Biol* **166**, 205-213, doi:10.1016/j.jsb.2009.01.004 (2009).
- 63 Pettersen, E. F. *et al.* UCSF Chimera-A visualization system for exploratory research and analysis. *J Comput Chem* **25**, 1605-1612, doi:10.1002/jcc.20084 (2004).
- 64 Punjani, A., Zhang, H. & Fleet, D. J. Non-uniform refinement: adaptive regularization improves single-particle cryo-EM reconstruction. *Nat Methods* **17**, 1214-1221, doi:10.1038/s41592-020-00990-8 (2020).
- 65 Zhang, K. Gctf: Real-time CTF determination and correction. *J Struct Biol* **193**, 1-12, doi:10.1016/j.jsb.2015.11.003 (2016).
- 66 Zivanov, J. *et al.* New tools for automated high-resolution cryo-EM structure determination in RELION-3. *eLife* **7**, e42166, doi:10.7554/eLife.42166 (2018).
- 67 Casanal, A., Lohkamp, B. & Emsley, P. Current developments in Coot for macromolecular model building of electron cryo-microscopy and crystallographic data. *Protein Sci* **29**, 1069-1078, doi:10.1002/pro.3791 (2020).



- 68 Frenz, B. *et al.* Automatically fixing errors in glycoprotein structures with Rosetta. *Structure* **27**, 134-139.e3, doi:10.1016/j.str.2018.09.006 (2019).
- 69 Klaholz, B. P. Deriving and refining atomic models in crystallography and cryo-EM: the latest Phenix tools to facilitate structure analysis. *Acta Crystallogr D Struct Biol* **75**, 878-881, doi:10.1107/S2059798319013391 (2019).
- 70 Pettersen, E. F. *et al.* UCSF ChimeraX: Structure visualization for researchers, educators, and developers. *Protein Sci* **30**, 70-82, doi:10.1002/pro.3943 (2021).
- 71 Otwinowski, Z. & Minor, W. Processing of X-ray diffraction data collected in oscillation mode. *Methods Enzymol* **276**, 307-326 (1997).
- 72 McCoy, A. J. *et al.* Phaser crystallographic software. *J Appl Crystallogr* **40**, 658-674, doi:10.1107/S0021889807021206 (2007).
- 73 Qiang, M. *et al.* Neutralizing antibodies to SARS-CoV-2 selected from a human antibody library constructed decades ago. *Adv Sci (Weinh)* **9**, e2102181, doi:10.1002/adv.202102181 (2022).
- 74 Emsley, P. & Cowtan, K. Coot: model-building tools for molecular graphics. *Acta Crystallogr D Biol Crystallogr* **60**, 2126-2132, doi:10.1107/S0907444904019158 (2004).
- 75 Adams, P. D. *et al.* PHENIX: a comprehensive Python-based system for macromolecular structure solution. *Acta Crystallogr D Biol Crystallogr* **66**, 213-221, doi:10.1107/S09074449052925 (2010).
- 76 Montiel-Garcia, D., Rojas-Labra, O., Santoyo-Rivera, N. & Reddy, V. S. Epitope-Analyzer: A structure-based webtool to analyze broadly neutralizing epitopes. *J Struct Biol* **214**, 107839, doi:10.1016/j.jsb.2022.107839 (2022).
